1 **Enhancing associative learning in rats with a computationally designed training**  
2 **protocol**

3 Zhang, Xu O; Zhang, Yili; Engelke, Douglas S; Cho, Claire E; Smolen, Paul; Byrne,  
4 John H; Do-Monte, Fabricio H#.

5  
6 #Corresponding author:

7 Fabricio H. Do Monte, DVM, PhD.

8 Department of Neurobiology and Anatomy

9 McGovern Medical School

10 The University of Texas Health Science Center at Houston

11 Houston, Texas 77030

12 Phone: 713-500-5613

13 Email: [fabricio.h.domonte@uth.tmc.edu](mailto:fabricio.h.domonte@uth.tmc.edu)

14  
15 **Keywords:** Associative memory, fear conditioning, fear extinction, long-term  
16 potentiation, learning model, spaced learning.

17  
18 **ABSTRACT**

19 Associative learning requires the activation of protein kinases with distinct temporal  
20 dynamics. Learning protocols with computationally designed intertrial intervals (ITIs)  
21 that maximize the interaction between fast-activated protein kinase A (PKA) and slow-  
22 activated extracellular signal-regulated kinase (ERK) enhance nonassociative learning  
23 in *Aplysia*. Here, we tested whether an optimal learning protocol with irregular ITIs,  
24 predicted computationally to increase the overlap between PKA and ERK signaling in  
25 rat hippocampus, would enhance associative learning in mammals. We simulated

26 ~1000 training protocols with irregular ITIs and identified an optimal protocol, predicted  
27 to induce stronger associative learning than standard protocols with fixed ITIs. With  
28 auditory fear conditioning, we showed that male adult rats exposed to the optimal  
29 conditioning protocol exhibited stronger fear memory retrieval and impaired fear  
30 memory extinction, compared to rats that received either massed or spaced  
31 conditioning protocols with fixed ITIs. With fear extinction, we likewise observed that  
32 fear conditioned rats exposed to the optimal extinction protocol showed improved  
33 extinction of contextual fear memory, compared to rats that received standard extinction  
34 protocols. Together, these findings demonstrate the capacity of a behavioral  
35 intervention driven by a computational model of memory-related signaling pathways to  
36 enhance associative learning in mammals and may provide greater insight into  
37 strategies to improve cognition in humans.

38

39

40

## 41 **INTRODUCTION**

42

43 Long-term memory (LTM) formation that lasts for days to years is believed to be  
44 mediated by synaptic plasticity including long-term potentiation (LTP) or its invertebrate  
45 analogue long-term facilitation (LTF), which require gene expression and protein  
46 synthesis ([Martin et al., 2000](#); [Kandel, 2001](#); [Lynch, 2004](#); [Alberini, 2009](#); [Byrne and](#)  
47 [Hawkins, 2015](#)). Studies in the last decades have investigated LTP/LTF and their  
48 underlying molecular processes as potential targets to enhance learning or restore

49 memory deficits in laboratory animals. However, traditional interventions using systemic  
50 cognitive enhancers or intracerebral pharmacological manipulations ([Sharif et al., 2021](#);  
51 [Lauterborn et al., 2016](#); [McGaugh and Petrinovich, 1965](#); [Lynch et al., 2014](#); [Fernandez](#)  
52 [et al., 2008](#)) are either based on trial-and-error approaches in specific model systems or  
53 are highly invasive, making the translation of such interventions difficult for human  
54 applications. The recent development of neural recording and optogenetic techniques  
55 has enabled precise control of neurons based on their intrinsic firing rates in order to  
56 enhance learning or modify memories ([Brown et al., 2012](#); [Nabavi et al., 2014](#); [Lee et](#)  
57 [al., 2017](#); [Liu et al., 2012](#)), but the use of these techniques in humans remains  
58 unforeseeable in the near future.

59

60 An alternative approach to enhance learning and memory is to develop computational  
61 models to predict optimal training protocols based on the intracellular molecular  
62 cascades that underlie LTM formation and LTP/LTF induction ([Smolen et al., 2016](#);  
63 [Smolen et al., 2020](#); [Zhang et al., 2021](#)). Previous studies have identified activation of  
64 PKA ([Schacher et al., 1988](#); [Goldsmith and Abrams, 1991](#); [Muller and Carew, 1998](#))  
65 and of the mitogen-activated protein kinase (MAPK) isoform ERK ([Martin et al., 1997](#);  
66 [Sharma and Carew, 2004](#); [Sharma et al., 2003](#)) as essential cascades for LTF. These  
67 two pathways converge to phosphorylate transcriptional factors such as cAMP  
68 responsive element binding protein (CREB), which subsequently induce expression of  
69 multiple plasticity-related genes ([Dash et al., 1990](#); [Bartsch et al., 1995](#); [Liu et al.,](#)  
70 [2011](#)). The observation that that these two pathways exhibit distinct kinetics of  
71 activation ([Muller and Carew, 1998](#); [Philips et al., 2007](#); [Zhang et al., 2021](#)), suggests

72 that the temporal activity patterns, and activation overlap, of these pathways may  
73 constitute an important target to enhance associative learning. Accordingly, our  
74 previous study demonstrated that a computationally designed protocol with irregular ITIs  
75 predicted to maximize the overlap of PKA and ERK activities enhances LTF and  
76 nonassociative learning, specifically the long-term sensitization of the tail elicited  
77 siphon-withdrawal reflex in *Aplysia* (Zhang et al., 2011).

78

79 Substantial similarities between molecular processes of LTF in invertebrates and LTP in  
80 mammals make it plausible that the same strategies used to enhance LTF and  
81 nonassociative learning in invertebrates could enhance LTP and associative learning in  
82 mammals. PKA activation in rodent hippocampus and amygdala is required for LTP and  
83 LTM (Schafe and LeDoux, 2000; Abel et al., 1997). Similarly, activation of ERK/MAPK  
84 cascades and their cross-talk with PKA kinase are required for the phosphorylation of  
85 CREB and LTP induction (Adams and Sweatt, 2002; Impey et al., 1998). Albeit with  
86 different kinetics than observed in invertebrates, PKA and ERK activation in mammals  
87 also differ considerably in temporal dynamics (Roberson and Sweatt, 1996; Vázquez et  
88 al., 2000; Wang et al., 2014), providing a similar opportunity to maximize their overlap  
89 with irregular ITIs in an attempt to enhance memory formation.

90

91 Here, we tested if the invertebrate LTF model (Zhang et al., 2011) can be adapted to  
92 computationally design an optimal associative learning protocol in mammals. Empirical  
93 data from the literature were used to model PKA and ERK dynamics in rat hippocampus  
94 (Wang et al., 2014; Roberson and Sweatt, 1996; Vázquez et al., 2000), a critical brain

95 region implicated in the formation of associative memories in mammals (Milner et al.,  
96 1998; Mayes et al., 2007; Nakazawa et al., 2002). Then we simulated ~1000 different  
97 training protocols with irregular ITIs and identified an optimal protocol, predicted to  
98 induce stronger memory than standard training protocols with fixed ITIs. Using auditory  
99 fear conditioning and fear extinction paradigms in rats, we confirmed that our  
100 computationally designed protocol enhanced the acquisition as well as the extinction of  
101 fear memories in mammals. This strategy may have potential clinical relevance for  
102 interventions aiming at facilitating memory formation in psychiatric disorders associated  
103 with cognitive impairment in humans, as well as to enhance extinction-based therapies  
104 in patients suffering from fear-related disorders.

105

## 106 **MATERIALS AND METHODS**

107

### 108 **Animals**

109 All experimental procedures were approved by the Center for Laboratory Animal  
110 Medicine and Care of The University of Texas Health Science Center at Houston.  
111 National Institutes of Health guidelines for the care and use of laboratory animals were  
112 strictly followed in order to minimize any potential discomfort and suffering. A total of  
113 120 male Long-Evans hooded adult rats (Charles Rivers Laboratories) 3-5 months of  
114 age and weighing 330-450 g were used. Rats were kept in a 12-hour light/12-hour dark  
115 cycle with food and water *ad libitum*. Experiments were conducted during the light  
116 phase. For the Optimal Extinction experiment, animals were maintained on a restricted  
117 diet of 18 g per day of standard laboratory rat chow to increase their motivation during

118 the lever press training. Rats' weights were monitored weekly to make sure that all  
119 animals maintained their weight under food restriction.

120

## 121 **Model Development**

122 The mathematical model for the activation of kinase cascades critical for long-term  
123 memory (LTM) was modified from a previous model of the signaling cascades for the  
124 induction of long-term synaptic facilitation (Zhang et al., 2011). As mentioned above, the  
125 induction of LTM for fear conditioning is known for requiring the activation of multiple  
126 kinase cascades with different temporal dynamics. In the model, the cyclic AMP (cAMP)-  
127 PKA pathway is rapidly activated after training, whereas the Raf- MEK-ERK pathway is  
128 slowly activated, and both are required for the induction of LTM after fear conditioning  
129 and extinction (**Fig. 1A, Fig. 4A**).

130 PKA Pathway. The dynamics of cAMP activation upstream of PKA following  
131 training and the cAMP-dependent activation of PKA are described by Eqs. 1-4. Inactive  
132 PKA is a holoenzyme ( $PKA_{RC}$ , Eq. 2), consisting of regulatory ( $PKA_R$ , Eq. 3) and catalytic  
133 ( $PKA_C$ , Eq. 4) subunits. In response to training, represented by the variable *Stim* in Eq.  
134 1, cAMP is activated (Eq. 1). Active cAMP binds to the regulatory subunit of PKA, leading  
135 to the release of free, active catalytic subunit (Fig. 1A) (Eqs. 2-4). '*Stim*' represents the  
136 neurotransmitters released by training that function to activate kinase cascades.

137

$$138 \quad \frac{d[cAMP]}{dt} = \lambda \frac{[Stim]}{[Stim] + K_{Stim}} - k_{b,cAMP}[cAMP] \quad (\text{Eq. 1})$$

$$139 \quad \frac{d[PKA_{RC}]}{dt} = k_{b,PKA}[PKA_C][PKA_R] - k_{f,PKA}[PKA_{RC}][cAMP]^2 \quad (\text{Eq. 2})$$

$$140 \quad \frac{d[PKA_R]}{dt} = k_{f,PKA}[PKA_{RC}][cAMP]^2 - k_{b,PKA}[PKA_C][PKA_R] \quad (\text{Eq. 3})$$

$$141 \quad \frac{d[PKA_C]}{dt} = k_{f,PKA}[PKA_{RC}][cAMP]^2 - k_{b,PKA}[PKA_C][PKA_R] \quad (\text{Eq. 4})$$

142 Parameter values are modified from Zhang et al. (2011) to activate PKA immediately  
 143 after training, but with PKA activity quickly returning to the basal in ~5 min (Fig. 1B)

144 (Roberson and Sweatt, 1996; Vázquez et al., 2000):  $\lambda = 14.6 \mu\text{M}/\text{min}$ ,  $K_{STIM} = 85 \mu\text{M}$ ,

145  $k_{b,cAMP} = 4 \text{ min}^{-1}$ ,  $k_{f,PKA} = 20 \mu\text{M}^{-2}\text{min}^{-1}$ ,  $k_{b,PKA} = 12 \mu\text{M}^{-1}\text{min}^{-1}$

146

147 ERK Pathway. The activation of ERK by training ‘*Stim*’ is via sequential activation  
 148 of the upstream kinases Raf and MEK (Fig. 1A). Raf activates the MAP kinase kinase  
 149 MEK, MEK in turn activates the MAP kinase ERK. The differential equations describing  
 150 the activation of Raf, MEK, and ERK (Eqs. 5-12) are similar to those in Zhang et al. (2011).  
 151 However, a discrete time delay in activation of Raf was removed from the phosphorylation  
 152 of Raf (Eq. 5). Instead, based on empirical data (Wang et al., 2014; Ajay and Bhalla,  
 153 2004), parameters describing the activation of Raf were adjusted from Zhang et al. (2011)  
 154 so that the ERK activation curve reached the peak around 20 min post-training (Fig. 1B).

$$155 \quad \frac{d[Raf^P]}{dt} = k_{f,Raf}[Raf][Stim] - k_{b,Raf}[Raf^P] \quad (\text{Eq. 5})$$

$$156 \quad [Raf] = [Raf]_{total} - [Raf^P] \quad (\text{Eq. 6})$$

$$157 \quad \frac{d[MEK]}{dt} = \frac{k_{b,MEK}[MEK^P]}{[MEK^P] + K_{MEK,2}} - \frac{k_{f,MEK}[Raf^P][MEK]}{[MEK] + K_{MEK,1}} \quad (\text{Eq. 7})$$

$$158 \quad \frac{d[MEK^{pp}]}{dt} = \frac{k_{f,MEK}[Raf^p][MEK^p]}{[MEK^p] + K_{MEK,1}} - \frac{k_{b,MEK}[MEK^{pp}]}{[MEK^{pp}] + K_{MEK,2}} \quad (\text{Eq. 8})$$

$$159 \quad [MEK^p] = [MEK]_{total} - [MEK] - [MEK^{pp}] \quad (\text{Eq. 9})$$

$$160 \quad \frac{d[ERK]}{dt} = \frac{k_{b,ERK}[ERK^p]}{[ERK^p] + K_{ERK,2}} - \frac{k_{f,ERK}[MEK^{pp}][ERK]}{[ERK] + K_{ERK,1}} \quad (\text{Eq. 10})$$

$$161 \quad \frac{d[ERK^{pp}]}{dt} = \frac{k_{f,ERK}[MEK^{pp}][ERK^p]}{[ERK^p] + K_{ERK,1}} - \frac{k_{b,ERK}[ERK^{pp}]}{[ERK^{pp}] + K_{ERK,2}} \quad (\text{Eq. 11})$$

$$162 \quad [ERK^p] = [ERK]_{total} - [ERK] - [ERK^{pp}] \quad (\text{Eq. 12})$$

163 Parameter values:  $k_{f,Raf} = 0.001 \mu\text{M}^{-1}\text{min}^{-1}$ ,  $k_{b,Raf} = 0.05 \text{min}^{-1}$ ,  $[Raf]_{total} = 0.5 \mu\text{M}$ ,

164  $k_{f,MEK} = 0.41 \text{min}^{-1}$ ,  $k_{b,MEK} = 0.04 \mu\text{M}/\text{min}$ ,  $K_{MEK,1} = 0.20 \mu\text{M}$ ,

165  $K_{MEK,2} = 0.19 \mu\text{M}$ ,  $[MEK]_{total} = 0.5 \mu\text{M}$ ,  $k_{f,ERK} = 0.41 \text{min}^{-1}$ ,

166  $k_{b,ERK} = 0.12 \mu\text{M}/\text{min}$ ,  $K_{ERK,1} = 0.19 \mu\text{M}$ ,

167  $K_{ERK,2} = 0.21 \mu\text{M}$ ,  $[ERK]_{total} = 0.5 \mu\text{M}$ .

168 As in Zhang et al. (2011), a variable 'inducer' was used to quantify the overlap of  
 169 activation between PKA and ERK, which together regulate the gene expression  
 170 necessary for the induction of LTM.

$$171 \quad inducer = k_{inducer} [PKA_C] [ERK^{pp}] \quad (\text{Eq. 13})$$

172 where  $k_{inducer} = 1 \mu\text{M}^{-1}$ .



173 To determine which protocols could more effectively activate *inducer*, four-trial  
174 protocols with three ITIs, each ranging from 2–20 min in steps of 2 min, were simulated.  
175 Combining these permutations yielded  $10^3$  protocols. For each protocol, the maximal  
176 (peak) overlap between PKA and ERK was quantified as the peak level of *inducer*  
177 produced. Also, the value of *Stim* was varied from 100 to 300  $\mu\text{M}$  to represent weak and  
178 strong trainings and to test the robustness of protocols. Based on the maximal overlap,  
179 a protocol with ITIs of 8, 8, and 16 min was selected and was denoted optimal partial  
180 conditioning (OPC). We assumed that fear conditioning and extinction activate the same  
181 signaling pathways, so we predicted this protocol would similarly enhance extinction.

182 Numerical methods. Fourth-order Runge-Kutta integration was used for  
183 integration of all differential equations with a time step of 3 s. Further time step reduction  
184 did not lead to significant improvement in accuracy. The steady-state levels of variables  
185 were determined after at least one simulated day, prior to any manipulations. The model  
186 was programmed in XPPAUT (<http://www.math.pitt.edu/~bard/xpp/xpp.html>) (Ermentrout,  
187 2002) and simulated on Dell Precision T1700 microcomputers.

188

189

## 190 **Behavioral Tasks**

### 191 ***Optimal Conditioning***

#### 192 *Apparatuses*

193 Two distinct chambers (context A and context B) positioned inside sound attenuating  
194 boxes were used during the Optimal Conditioning experiments. Context A consisted of a  
195 small operant chamber (34 cm high x 25 cm wide x 23 cm deep, 200 lux, Med

196 Associates, see schematic drawing in Fig. 2A top) with one of the two aluminum walls  
197 covered by black adhesive paper and two transparent acrylic walls, and a metal grid  
198 floor beneath which a microcentrifuge tube (Eppendorf) containing 50  $\mu$ l of 10% amyl  
199 acetate (Sigma-Aldrich) was positioned. Context B consisted of a larger acrylic operant  
200 chamber (40 cm high x 50 cm wide x 26 cm deep, 20 lux, Med Associates, see  
201 schematic drawing in Fig. 2A bottom) with one of its walls covered by a black and white  
202 stripped paper, and a floor made of a white acrylic board beneath which a  
203 microcentrifuge tube (Eppendorf) containing 50  $\mu$ l of deionized water was positioned.

204

#### 205 *Procedures*

206 On day 0, rats were placed in context A for a 20-min familiarization session. Next, rats  
207 were assigned to three experimental groups by matching their baseline freezing and  
208 locomotor activity during the familiarization session: Full Conditioning (FC), Partial  
209 Conditioning (PC), and Optimal Partial Conditioning (OPC). On day 1, rats were placed  
210 into context A and exposed to one nonreinforced habituation tone (3 kHz, 75 dB, 30 s)  
211 followed by distinct fear conditioning protocols (44 min duration). The FC group received  
212 eight presentations of a conditioned stimulus (CS, 3 kHz tone, 75 dB, 30 s) that co-  
213 terminated with an unconditioned stimulus (US, footshock, 0.7 mA, 0.5 s), with fixed ITIs  
214 of 270 s. The PC group received four similar CS-US pairings with the same ITIs of 270  
215 s, and remained in the chamber until the end of the session. The OPC group received  
216 four similar CS-US pairings with ITIs of 8, 8, and 16 min. On day 2, rats were placed in  
217 context B and given two CS presentations (ITI of 150 s, 7 min duration) in the absence  
218 of US to test the retrieval of tone-associated fear memory in a novel context. On day 3,

219 rats were returned to context A for an extinction training session where they received  
220 twelve CS presentations (ITIs of 150 s, 37 min duration). The first four CSs were  
221 compared to the last four CSs to assess extinction learning within the same session. On  
222 day 4 and 5, rats were placed back in context A and B, respectively, and exposed to an  
223 extinction retrieval session (similar to day 2). On day 29 and 30, rats were placed back  
224 in context A and B, respectively, and exposed to a spontaneous recovery session  
225 (similar to day 2). On day 1 and day 2, rats in the same group were trained  
226 simultaneously in four chambers with the group order counterbalanced to avoid  
227 interference from different protocols in neighboring chambers. On the following days,  
228 rats were simultaneously tested in four chambers regardless of the group assignment.  
229 Each rat was tested in the exact same chamber across the days. Footshocks, tones,  
230 intertrial intervals, and session duration were controlled by an automated video tracking  
231 system (ANY-maze, Stoelting), which also quantified the percentage of time freezing,  
232 distance traveled, average speed and maximum speed. All rats passed the criteria of  
233 20% of freezing during at least one CS of the fear conditioning session and the first two  
234 CSs of the extinction session.

235

### 236 ***Optimal vs. Spaced Partial Conditioning***

#### 237 *Apparatus and Procedures*

238 The same apparatus and contexts described above were used. Following familiarization  
239 on Day 0, rats were randomly assigned to two groups: Optimal Partial Conditioning  
240 (OPC) and Spaced Partial Conditioning (SPC). The same procedures described above  
241 were used here, except that: *i*) the footshock intensity was reduced from 0.7 mA to 0.5

242 mA to decrease the possibility of ceiling effects; *ii*) the SPC group received four CS-US  
243 pairings with ITIs of 11 min and 10 s. The same automated video tracking system (ANY-  
244 maze, Stoelting) described above was used for protocol control and behavioral  
245 quantification. One rat that failed the criteria of 20% of freezing during at least one CS of  
246 the fear conditioning session and the first two CSs of the extinction session was  
247 excluded from the analyses.

248

## 249 ***Optimal Extinction***

### 250 *Lever-press training*

251 Rats were placed in an acrylic/aluminum operant chamber (34 cm high x 25 cm wide x  
252 23 cm deep, Med Associates, see schematic drawing in Fig. 4A) and trained to press a  
253 lever for sucrose on a fixed ratio of one pellet for each press. Next, animals were trained  
254 in a variable interval schedule of reinforcement that was gradually reduced across the  
255 days (one pellet every 15 s, 30 s, or 60 s) until they reached a minimum criterion of 10  
256 presses/min after 7 days of training. All sessions lasted 30 min and were performed on  
257 consecutive days. Sucrose pellet delivery, variable intervals, and session duration were  
258 controlled by an automated video tracking system (ANY-maze, Stoelting).

259

### 260 *Apparatus and Procedure*

261 On day 8, rats were placed into the same chamber where they had previously  
262 undergone lever presses training. Animals were exposed to five nonreinforced  
263 habituation tones (3 kHz, 75 dB, 30 s duration) followed by seven CS-US pairings (ITIs  
264 of 150 s, 37 min duration). The footshock intensity was increased from 0.7 mA to 1.0-

265 1.2 mA to result in stronger fear acquisition and consequently higher freezing levels  
266 during the extinction training session in the next day. Rats were assigned to three  
267 experimental groups by matching their freezing and lever presses during the fear  
268 conditioning session: Full Extinction (FE), Partial Extinction (PE), and Optimized Partial  
269 Extinction (OPE). On day 9, rats were returned to the same chamber for a fear  
270 extinction session (39 min duration). The FE group received twelve CSs with ITIs of 150  
271 s; the PE group received four CSs with ITIs of 150 s and remained in the chamber until  
272 the end of the session; and the OPE group received four CSs with ITIs of 8, 8, and 16  
273 min. On day 10 and 35, rats were placed into the same chamber and received two CSs  
274 with an ITI of 150 s to test the strength of fear extinction memory during extinction  
275 retrieval and spontaneous recovery tests, respectively. The same automated video  
276 tracking system (ANY-maze, Stoelting) described above was used for protocol control  
277 and behavioral quantification. Two rats that never reached the criterium of 20% of  
278 freezing during at least one CS of the fear conditioning session and the first two CSs of  
279 the extinction session were excluded from the analyses.

280

### 281 **Quantification and statistical analysis**

282 Rats were recorded with digital video cameras (Logitech C920) and behavioral indices  
283 were measured using automated video-tracking system (ANY-maze). Lever presses per  
284 minute were calculated by measuring the number of presses during the 30 s cue (or 30  
285 s pre-cue) multiplied by two. All graphics and numerical values reported in the figures  
286 are presented as mean  $\pm$  standard error of the mean (SEM). Grubbs's tests were used  
287 to identify outliers ( $p < 0.05$ ) in each experiment and one rat in Fig. 2 was removed after

288 identified by the test. Shapiro-wilk test was performed to determine whether the data  
289 have a normal distribution. F test before pair-wise comparison and Brown-Forsythe test  
290 before multiple group comparison were performed to test if groups have the same  
291 variance. Statistical significance for parametric distributions was determined with paired  
292 Student's t test, Welch's t test, one-way analysis of variance (ANOVA) or two-way  
293 repeated-measures ANOVA followed by Tukey post-hoc comparisons, whereas  
294 Kruskal-Wallis test followed by Dunn's post-hoc test was used for non-parametric  
295 distributions (Prism 7), as indicated for each experiment. Sample size was based on  
296 estimations from previous literature and experience.

297

#### 298 **Data availability**

299 All data that support the findings presented in this study are available from the  
300 corresponding author on reasonable request. Source codes will be submitted to the  
301 ModelDB database ([McDougal et al., 2015](#)), and to GitHub (link to be updated).

302

## 303 **RESULTS**

### 304 ***A computational model based on PKA and ERK dynamics in rats identified an*** 305 ***optimal partial fear conditioning protocol***

306

307 Our model previously used in *Aplysia* ([Zhang et al., 2011](#)) was adapted to simulate the  
308 dynamics of PKA and ERK during the process of LTP induction in rat hippocampus  
309 (**Fig. 1A**). In this model, the stimulus (*Stim*), which represents tetanic stimuli, rapidly  
310 activates PKA via the cAMP pathway and slowly activates ERK via the Raf-MEK

311 pathway. The synergistic interaction between PKA and ERK pathways is quantified by a  
312 variable *inducer*, which corresponds to the efficacy of the stimulus in inducing LTP. ERK  
313 kinetics were described by differential equations (see [Methods](#)) with parameter values  
314 reproducing empirical findings that ERK activity reaches peak levels 15~20 min after  
315 BDNF treatment or tetanic stimuli in rat hippocampus acute slices ([Wang et al., 2014](#);  
316 [Ajay and Bhalla, 2004](#)). Equations describing PKA kinetics simulated data showing that  
317 PKA is transiently activated within 2 min after LTP induction in slices from rat  
318 hippocampus or within 5 min *in vivo* after spatial discrimination task training ([Roberson](#)  
319 [and Sweatt, 1996](#); [Vázquez et al., 2000](#)). We used this model to simulation fear  
320 conditioning in rats, in which the pairing of a conditioned stimulus (CS) with an  
321 unconditioned stimulus (US) is represented by *Stim*, and the conditioned responses are  
322 proportional to the peak value of *inducer*. We observed that a single CS-US pairing  
323 produced little overlap between PKA and ERK pathways (**Fig. 1B1**). We then simulated  
324 ~1000 partial fear conditioning protocols, with 4 trials and varying ITIs, to identify one  
325 predicted to have optimal ITIs for triggering downstream gene activation. To compare,  
326 we also simulated a Full Conditioning (FC) protocol with 8 trials and a fixed ITI of 270 s,  
327 and a Partial Conditioning (PC) protocol with 4 trials and the same ITI of 270 s, which  
328 resemble previous protocols used for full and partial fear conditioning in rats ([Detert et](#)  
329 [al., 2008](#); [Lonsdorf et al., 2017](#)). Our simulation identified an Optimal Partial  
330 Conditioning (OPC) protocol with 4 trials and irregular ITIs of 8, 8, and 16 min, which  
331 was able to produce higher peak *inducer* than the standard PC protocol (**Fig. 1B2-1B4**).  
332 Based on our simulation, we predicted that the computationally designed OPC protocol  
333 would produce stronger long-term memory in rats than the standard PC protocol.

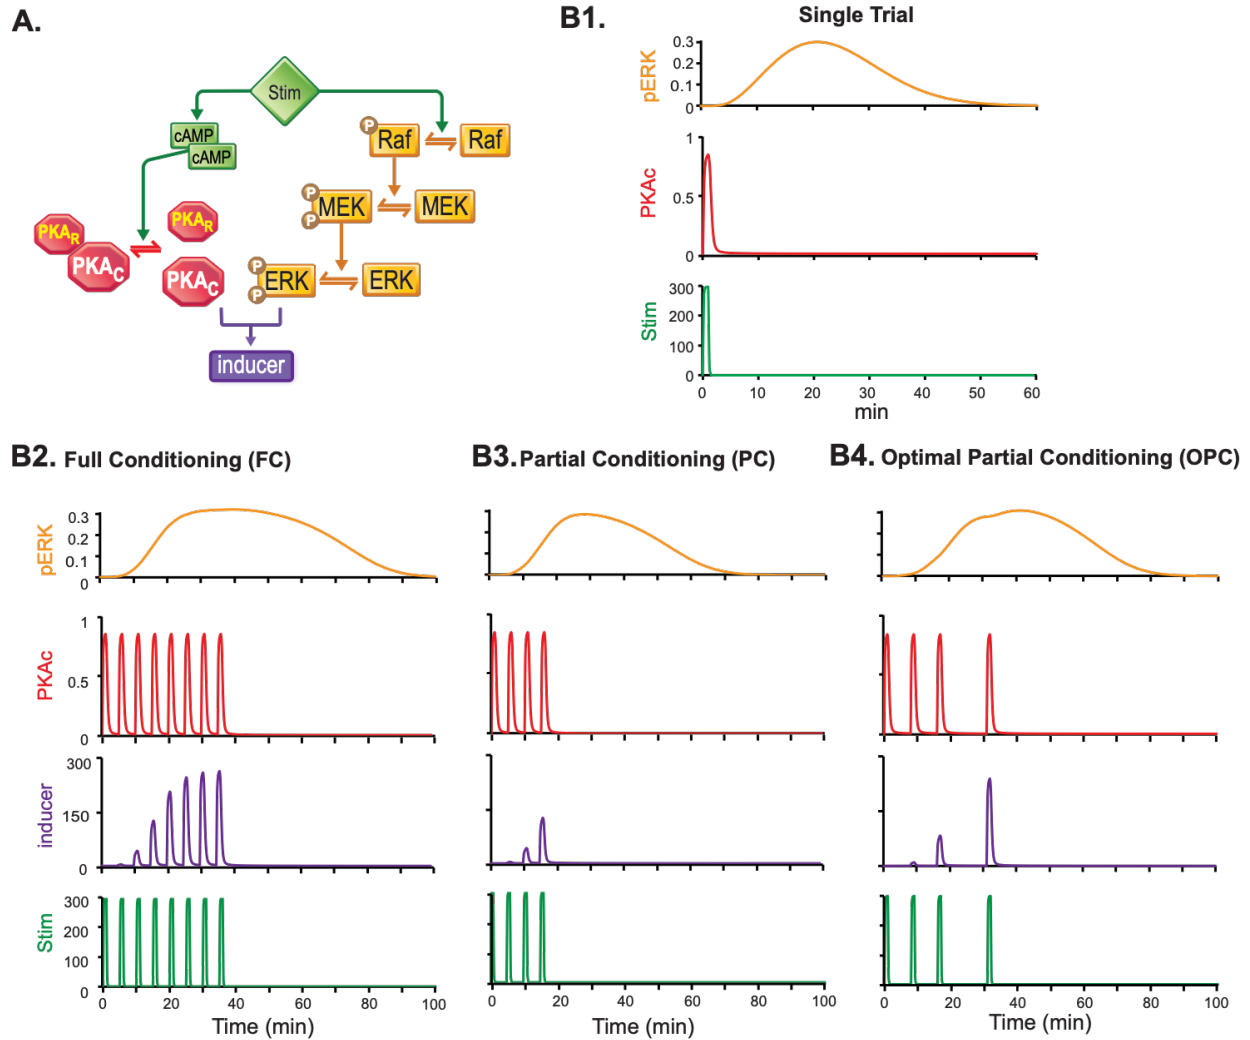

334

335 **Figure 1. Computational simulations of PKA and ERK pathways predict an optimal protocol for**  
 336 **fear conditioning. A,** Schematic of the model. Stimulus (*Stim*) activates PKA via cAMP and activates  
 337 ERK via Raf-MEK. The variable *inducer* quantifies the PKA/ERK interaction (activity overlap). **B1,**  
 338 Simulated time courses of activated ERK (pERK, orange traces,  $\mu\text{M}$ ) and activated PKA (PKAc, red  
 339 traces) in response to one trial of *Stim* ( $\mu\text{M}$ ). **B2,** Simulated time courses of pERK (orange traces,  $\mu\text{M}$ ),  
 340 PKAc (red traces) and *inducer* (violet traces, nM) in response to an 8-trial protocol with regular ITIs of 4.5  
 341 min (full conditioning, FC). **B3,** Simulated time courses of pERK (orange traces), PKAc (red traces), and  
 342 *inducer* (violet traces) in response to a 4-trial protocol with regular ITIs of 4.5 min (partial conditioning,  
 343 PC). **B4,** Simulated time courses of pERK (orange traces), PKAc (red traces) and *inducer* (violet traces)



344 in response to a 4-trial protocol with computationally designed intervals (optimal partial conditioning,  
345 OPC).

346

347 ***The optimal partial conditioning protocol induces stronger fear memory than a***  
348 ***standard partial conditioning protocol***

349

350 To test if the computationally designed OPC protocol could enhance associative  
351 learning in rats, we used a classical auditory fear conditioning paradigm. Because the  
352 hippocampus is required for context encoding during fear conditioning ([Phillips and](#)  
353 [LeDoux, 1992](#); [Selden et al., 1991](#); [Maren et al., 2013](#)), we used two different chambers  
354 (context A and context B) to assess the contribution of the context to the auditory fear  
355 memory. The two contexts differed in size, floor texture, visual decoration of the walls,  
356 and odor cues (**Fig. 2A**). On Day 0, rats were pre-exposed to context A for 20 min to  
357 familiarize with the chamber where fear conditioning took place in the following day.  
358 After matching their baseline freezing and locomotor activity during the familiarization  
359 session (**Fig. S1**), rats were assigned to one of the three experimental groups described  
360 above in our simulation experiments: Full Conditioning (FC), Partial Conditioning (PC),  
361 and Optimal Partial Conditioning (OPC). On Day 1, rats were placed into context A and  
362 exposed to one nonreinforced habituation tone (3 kHz, 75 dB, 30 s) followed by distinct  
363 fear conditioning protocols (44 min duration, **Fig. 2B**). The FC group received eight  
364 presentations of CS (3 kHz tone, 75 dB, 30 s) that co-terminated with an US (footshock,  
365 0.7 mA, 0.5 s) with ITIs of 270 s. The PC group received four similar CS-US pairings  
366 with the same ITIs of 270 s, and remained in the chamber until the end of the session to  
367 equate the total context exposure time. The OPC group received four similar CS-US

368 pairings with ITIs of 8, 8, and 16 min. All groups reached high levels of freezing (> 65%,  
369 **Fig. 2C**) and reduced locomotion at the end of the fear acquisition session. On Day 2,  
370 rats were placed in context B and given two CS presentations (ITI of 150 s, 7 min  
371 duration) in the absence of US to test the retrieval of tone-associated fear memory in a  
372 novel context. Compared to the FC group, both PC and OPC groups exhibited less  
373 freezing during the second CS presentation (Two-way repeated measures (RM)  
374 ANOVA followed by Tukey's post-hoc test.  $F_{(2, 37)} = 3.751$ ,  $P = 0.033$ ; FC vs. OPC:  $p =$   
375  $0.029$ ; FC vs. PC:  $p = 0.002$ ; OPC vs. PC:  $p = 0.527$ ). Nevertheless, both FC and OPC  
376 groups showed reduced average speed during the retrieval test compared to the  
377 standard PC group, suggesting stronger fear retrieval in a novel context (**Fig. 2D**; One-  
378 way ANOVA followed by Tukey's post hoc test.  $F_{(2, 37)} = 10.87$ ,  $P < 0.001$ ; FC vs. OPC:  
379  $p = 0.131$ ; FC vs. PC:  $p < 0.001$ ; OPC vs. PC:  $p = 0.024$ ). On Day 3, rats were returned  
380 to context A for an extinction training session where they received twelve CS  
381 presentations (ITIs of 150 s, 37 min duration). Although no significant differences in  
382 freezing levels were observed among the groups during each CS presentation (Two-  
383 way RM ANOVA.  $F_{(22, 407)} = 1.169$ ,  $P = 0.271$ ), a within session extinction analysis  
384 comparing the first four CSs to the last four CSs revealed impaired extinction learning in  
385 the FC and OPC groups, when compared to the PC group. This impairment in the  
386 acquisition of extinction in the FC and OPC groups was characterized by sustained  
387 freezing levels across the session, which differed from the PC group that showed  
388 reduced freezing levels from the first to the last CSs presentation (**Fig. 2E left**; Paired  
389 Student's t test. FC:  $t_{13} = 2.153$ ,  $p = 0.051$ ; PC:  $t_{11} = 4.191$ ,  $p = 0.001$ ; OPC:  $t_{13} = 0.869$ ,  
390  $p = 0.400$ ). Interestingly, the OPC group exhibited persistent freezing levels during the

391 extinction training session as indicated by a reduced relative change in freezing from  
392 the beginning to the end of the session, when compared to the PC group (**Fig. 2E right**;  
393 One-way ANOVA followed by Tukey's post-hoc test.  $F_{(2, 37)} = 3.315$ ,  $P = 0.047$ ; FC vs.  
394 OPC:  $p = 0.487$ ; FC vs. PC:  $p = 0.320$ ; OPC vs. PC:  $p = 0.037$ ). Despite the persistent  
395 freezing levels across the extinction training session observed in the OPC group, no  
396 significant differences were found between the OPC and the PC groups during either  
397 the extinction retrieval tests performed on Days 4 and 5 (Two-way RM ANOVA. context  
398 A:  $F_{(2, 37)} = 0.097$ ,  $P = 0.907$ ; context B:  $F_{(2, 37)} = 2.984$ ,  $P = 0.063$ ) or the spontaneous  
399 recovery tests performed on Days 29 and 30 (**Fig. 2C**; Two-way RM ANOVA followed  
400 by Tukey's post hoc test. context A:  $F_{(2, 37)} = 3.259$ ,  $P = 0.049$ ; FC vs. OPC:  $p = 0.027$ ;  
401 FC vs. PC:  $p = 0.038$ ; OPC vs. PC:  $p = 0.999$ ; context B:  $F_{(2, 37)} = 0.774$ ,  $P = 0.469$ ).  
402 Taken together, these data demonstrate that the computationally designed training  
403 protocol (OPC) is able to enhance fear acquisition in rats, thereby resulting in a stronger  
404 fear memory that is more resistant to extinction.

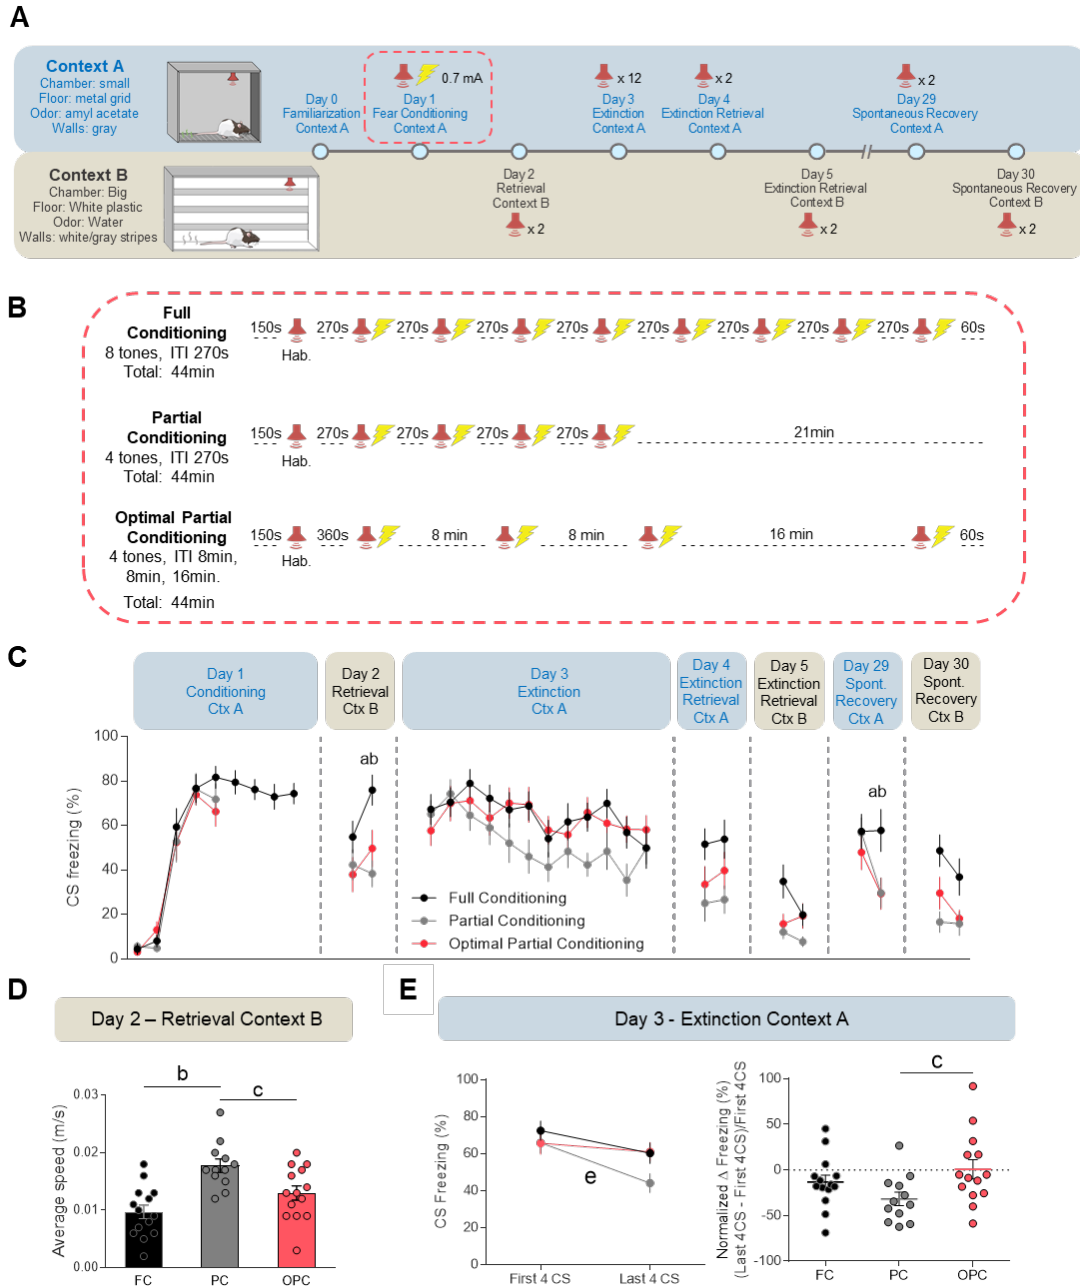

405

406 **Figure 2. Computationally designed protocol enhanced fear conditioning in rats. A,** Schematics of

407 the enhanced fear conditioning experimental procedures. Top: tests that were conducted in Context A.

408 Bottom: tests that were conducted in Context B. **B,** Schematics of the fear conditioning protocols for full

409 conditioning (FC,  $n = 14$ ), partial conditioning (PC,  $n = 12$ ), and optimal partial conditioning groups (OPC,

410  $n = 14$ ). Following a habituation (Hab.) tone, rats received multiple trials of a conditioned stimulus (CS, 3

411 kHz tone, 30 s) that co-terminated with an unconditioned stimulus (US, footshock, 0.7 mA, 0.5 s). **C,**

412 Freezing levels during CS presentations of each group across the experiment. Two-way Repeated-  
413 Measure ANOVA for each day followed by Tukey's post hoc test. Letters a, b, and c indicate pairwise  
414 post hoc tests with  $p < 0.05$ : a, FC vs. OPC; b, FC vs. PC; c, OPC vs. PC. **D**, OPC group shows lower  
415 average speed compared to PC group. One-way ANOVA followed by Tukey post hoc test. Letters b and c  
416 indicate pairwise tests with  $p < 0.05$ : b, FC vs. PC ; c, OPC vs. PC. **E**, OPC group is resistant to extinction  
417 while PC group shows significantly more extinction. Left, the freezing levels during the first 4 and last 4  
418 CS presentations. Paired Student's t test. Letter e indicates test with  $p < 0.05$ : PC, Last 4 CS vs. First 4  
419 CS. Right, normalized change of the freezing level during extinction, as indicated by the difference of the  
420 freezing levels between last 4 and first 4 CS presentations as a percentage of the freezing level of the  
421 first 4 CS presentations. One-way ANOVA followed by Tukey's post hoc test. \*  $p < 0.05$ . Letter c indicates  
422 pairwise test with  $p < 0.05$ : OPC vs. PC. Data shown here and in subsequent illustrations as mean  $\pm$   
423 SEM.

424

425 ***The optimal partial conditioning protocol induces stronger fear memory than a***  
426 ***spaced partial conditioning protocol***

427

428 Previous studies have demonstrated that spaced learning protocols result in stronger  
429 memories than standard (i.e., massed) learning protocols in both humans ([Cepeda et al., 2006](#); [Raman et al., 2010](#)) and rodents ([Anderson et al., 2008](#); [Jiang et al., 2019](#);  
430 [Scharf et al., 2002](#); but also see [Cain et al., 2003](#)). Thus, an alternative explanation for  
431 the augmented fear memory observed in the OPC group in Fig. 2 could be simply a  
432 trial-spacing effect, because our standard PC group used massed CS-US pairings.  
433 Indeed, there was a broad range of effective 4-trial protocols (**Fig. S2**), with one  
434 protocol with fixed 11 min 10 s ITIs producing a nearly identical peak level of inducer as  
435 the OPC protocol, and a higher peak level of inducer than other protocols with fixed ITIs  
436

437 from 1 min to 21 min (**Fig. 3A1, Fig. S2A**). We termed this protocol the spaced partial  
438 conditioning (SPC) protocol. We also examined the effects of different stimulus  
439 intensities on predicting optimal training trials. The 1,000 different protocols were re-  
440 simulated with a reduced intensity of stimulus. Interestingly, the protocol with 4 trials  
441 and irregular ITIs of 8, 8, and 16 min still produced the greatest peak level of inducer  
442 (**Fig. 3A2, Fig. S2B**). Equally interesting was that with weaker stimuli, the OPC protocol  
443 became relatively more effective than the SPC protocol. Therefore, we predicted that  
444 empirically, the irregular intervals of the OPC may produce more effective conditioning  
445 than the SPC protocol. To test this hypothesis, we conducted an experiment to compare  
446 the OPC and SPC protocols using a reduced shock intensity (0.5 mA instead of the 0.7  
447 mA used in Fig. 2) (**Fig. 3B**). Rats were assigned to OPC or SPC groups by matching  
448 their baseline freezing and locomotor activity during the familiarization session  
449 (**Supplementary Fig. 1B**). During the fear acquisition, the SPC group received 4 CS-  
450 US pairings with ITIs of 11 min and 10 s, whereas the OPC group was exposed to the  
451 same protocol as in Fig. 2 (*i.e.*, 4 CS-US pairings with ITIs of 8, 8, and 16 min) (**Fig.**  
452 **3C**). We found that the difference in the ITIs between the OPC and SPC groups was  
453 sufficient to result in distinct levels of fear memory acquisition. Rats exposed to OPC  
454 showed higher CS freezing levels during the third CS-US pairing of the fear acquisition  
455 session (**Fig. 3D Day 1**; Two-way RM ANOVA followed by Tukey's planned  
456 comparison.  $F_{(4, 64)} = 1.550$ ,  $P = 0.339$ ; OPC vs. SPC:  $p = 0.019$ ). In addition, fear  
457 memory retrieval was increased when rats in the OPC group were returned to context A  
458 for an extinction training session on Day 3, as indicated by higher freezing during the  
459 first two CS presentations, compared to the SPC group (**Fig. 3D Inset**; Welch's t test.

460  $t_{12,43} = 2.227, p = 0.045$ ). Both OPC and SPC groups exhibited the same levels of  
461 freezing by the end of the extinction training session (**Fig. 3D Day 3**; Two-way RM  
462 ANOVA followed by Tukey's post hoc test.  $F_{(11, 176)} = 2.997, P = 0.001$ ; Tone 12, OPC  
463 vs. SPC:  $p > 0.999$ ), as well as during the extinction retrieval tests performed in context  
464 A (**Fig. 3D Day 4**; Two-way RM ANOVA.  $F_{(2, 37)} = 0.097, P = 0.907$ ) or context B (**Fig.**  
465 **3D Day 5**; Two-way RM ANOVA.  $F_{(2, 37)} = 2.984, P = 0.629$ ). However, fear memory  
466 spontaneously recovered when rats in the OPC group were retested in context A  
467 approximately 3 weeks later, as indicated by higher freezing during the first CS  
468 presentation compared to SPC-trained rats (**Fig. 3D Day 29**; Two-way RM ANOVA  
469 followed by Tukey's planned comparison.  $F_{(2, 32)} = 1.809, P = 0.180$ ; OPC vs. SPC:  $p =$   
470  $0.030$ ). In summary, these data suggest that the enhancement in fear memory  
471 acquisition observed with our computationally designed OPC protocol cannot simply be  
472 attributed to a trial-spacing effect or differences in the delay to remove the animals from  
473 the chamber, but it is rather associated with the maximized overlap between PKA and  
474 ERK signaling.

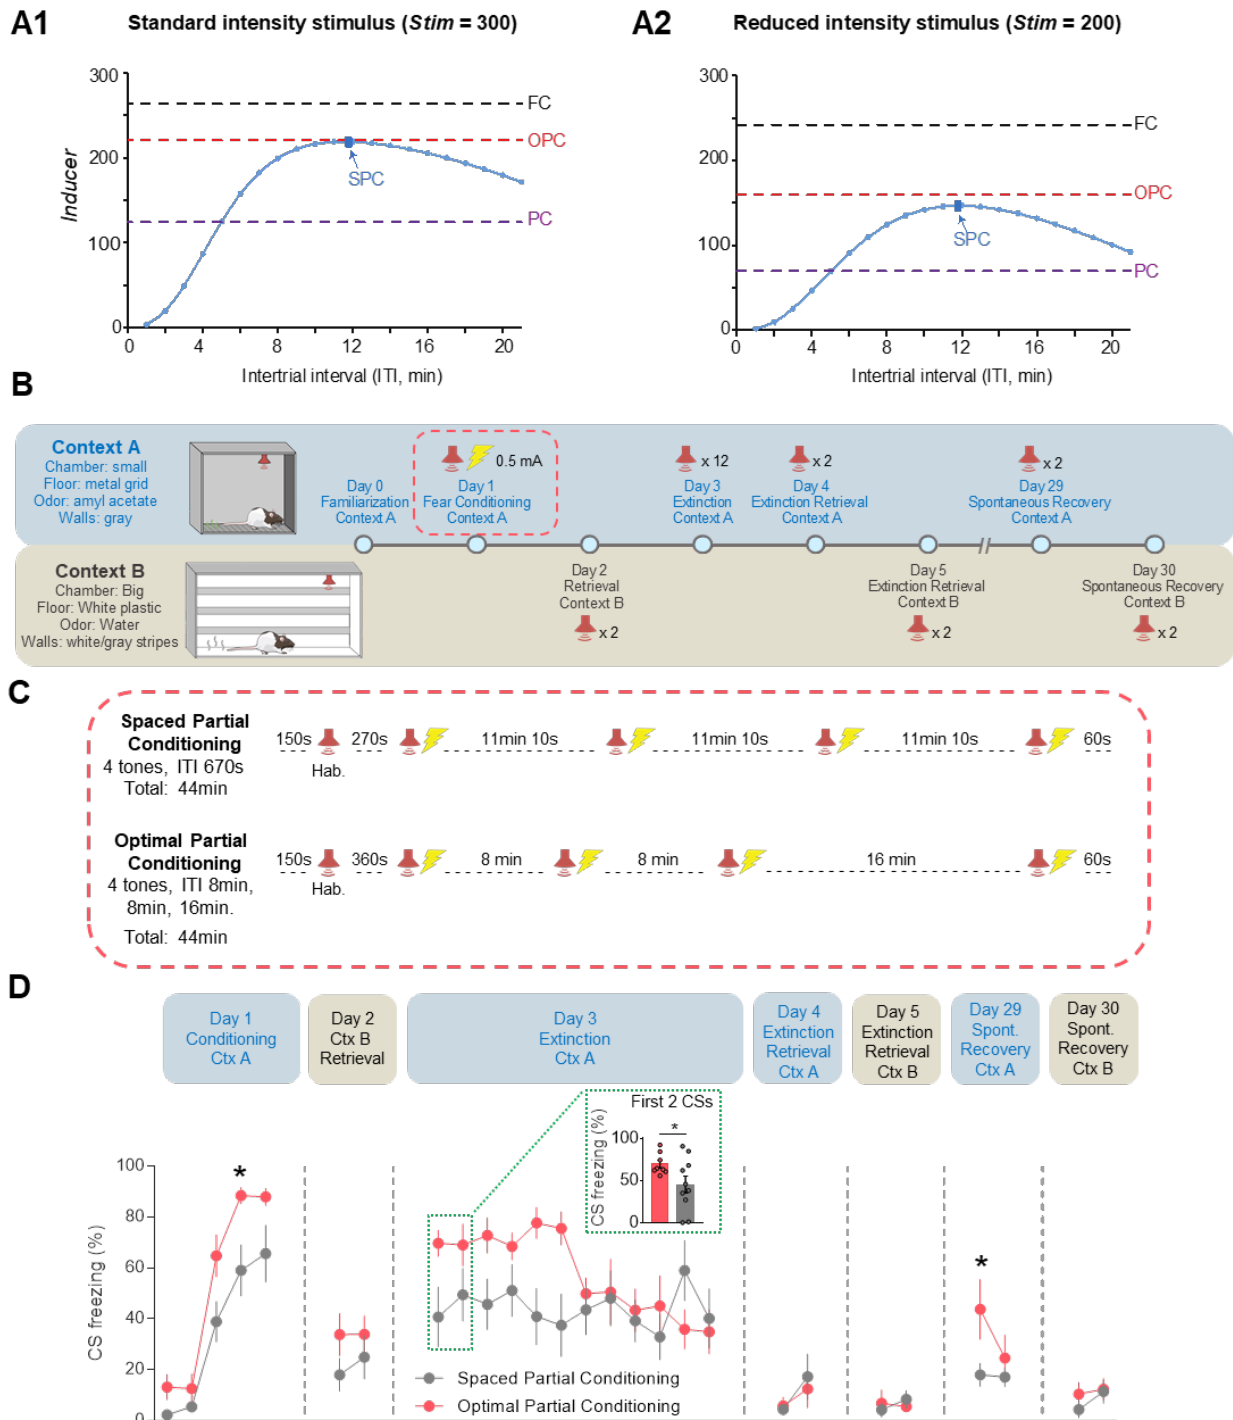

475

476 **Figure 3. Optimal partial conditioning protocol induced stronger fear memory than spaced partial**  
 477 **conditioning protocol in rats. A, Inducer peak levels from the FC, PC, and OPC protocols, compared to**  
 478 **peak levels from partial conditioning protocols of 4 trials with regular ITIs varying from 1 to 21 min, using**  
 479 **standard intensity stimulus (A1) or reduced intensity stimulus (A2). The peak inducer values of FC, PC,**



480 and OPC are labeled by dashed lines (black: FC; red: OPC; purple: PC). The blue curve gives peak  
481 *inducer* values for the protocols with regular ITIs, and the curve peaks at the dark blue dot and arrow,  
482 representing the SPC protocol with equal ITIs of 11 min and 10 s. **B**, Schematics of the fear conditioning  
483 procedures. Top: tests that were conducted in Context A. Bottom: tests that were conducted in Context B.  
484 **C**, Schematics of the fear conditioning protocols for optimal partial conditioning (OPC,  $n = 8$ ), and spaced  
485 partial conditioning groups (SPC,  $n = 10$ , ITI = 670 s). Following a habituation (Hab.) tone, rats received 4  
486 trials of a conditioned stimulus (CS, 3 kHz tone, 30 s) that co-terminated with an unconditioned stimulus  
487 (US, footshock, 0.5 mA, 0.5 s). **D**, Freezing levels during CS presentations of each group across the  
488 experiment; Two-way repeated-measure ANOVA for each day followed by Tukey's pairwise post hoc test,  
489 \*  $p < 0.05$ . Inset: the average freezing level during the first two CS presentations; Welch's t test, \*  $p < 0.05$ .

490

491 ***The computationally designed optimal partial conditioning protocol also***  
492 ***enhanced fear extinction***

493

494 Extinction is a new learning that temporarily inhibits the initial associative memory ([de](#)  
495 [Oliveira Alvares and Do-Monte, 2021](#); [Quirk and Mueller, 2008](#)). Because previous  
496 studies suggest that the molecular mechanisms underlying fear extinction learning are  
497 similar to those underlying fear acquisition ([Berman and Dudai, 2001](#); [Flood et al., 1977](#);  
498 [Radulovic and Tronson, 2010](#); [Santini et al., 2001](#); [Szapiro et al., 2003](#); [Tronson et al.,](#)  
499 [2008](#)), we hypothesized that the computationally designed protocol would also enhance  
500 the acquisition of extinction, suppressing the original fear memory. We therefore used  
501 the OPC protocol with 4 trials and irregular ITIs of 8, 8, and 16 min as an Optimal Partial  
502 Extinction (OPE) protocol (**Fig. 4B4**). We compared the OPE protocol with a Full  
503 Extinction (FE, **Fig. 4B2**) protocol using 12 trials and ITIs of 150 s, and a Partial  
504 Extinction (PE, **Fig. 4B3**) protocol using 4 trials and the same ITIs of 150 s, which

505 resemble previous protocols used for full and partial fear extinction in rats (Santini et al.,  
506 2004; Holmes and Quirk, 2010; Do-Monte et al., 2015). Similar to the simulation results  
507 for the conditioning protocols, the OPE protocol triggered higher peak *inducer* than the  
508 PE protocol with equal ITIs of 150 s, and was comparable to the FE protocol (Fig. 4B).  
509 We thus predicted the OPE protocol would result in stronger extinction of fear memory  
510 than the standard PE protocol.

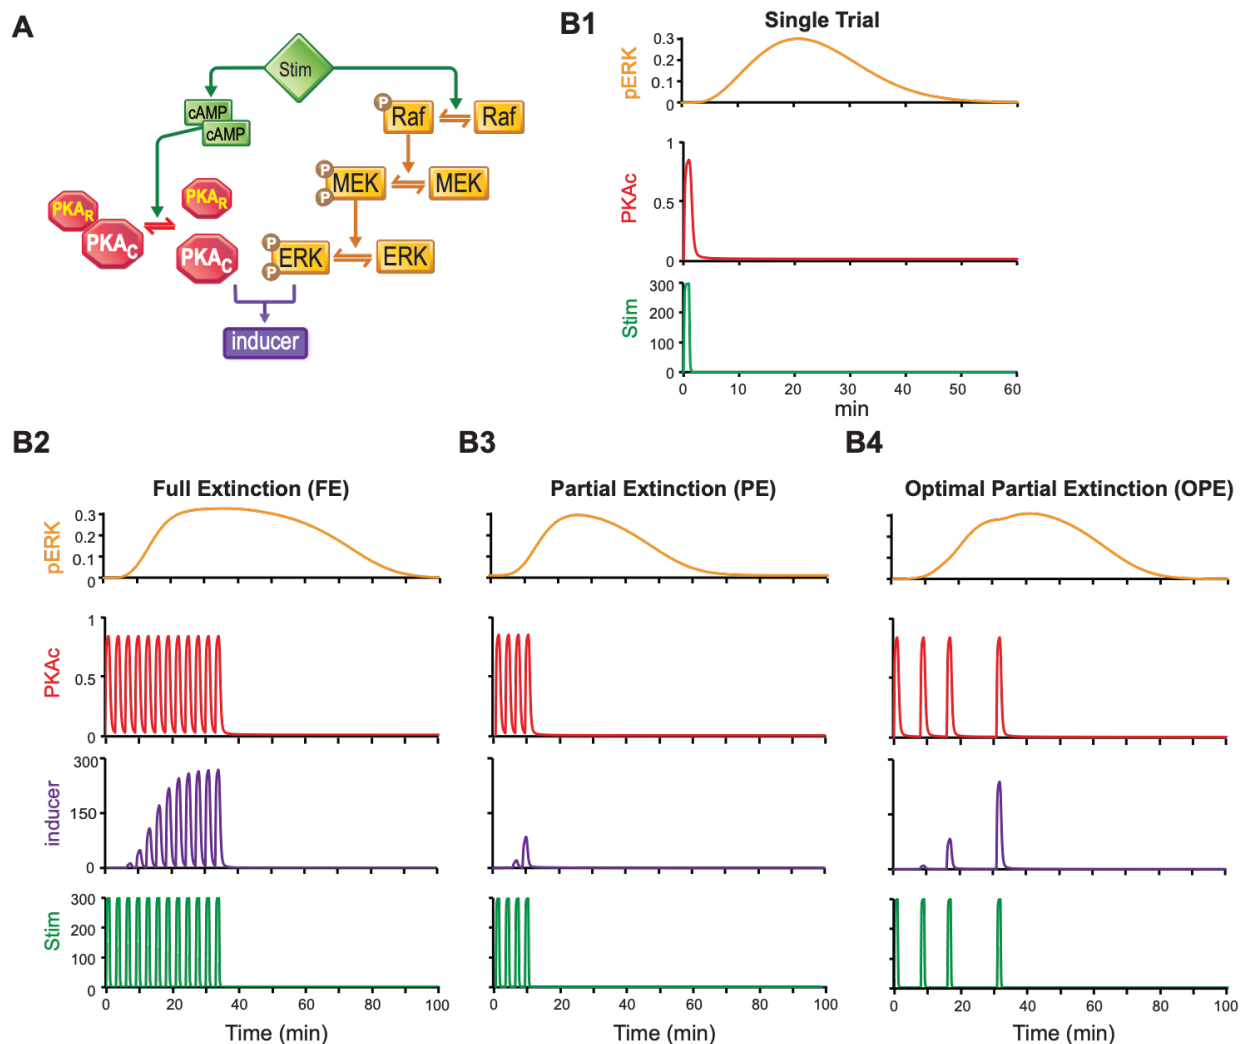

511  
512 **Figure 4. Prediction of enhanced protocol for fear extinction. A**, Schematic of the model. **B1**,  
513 Simulated time courses of activated ERK (pERK, orange traces,  $\mu\text{M}$ ) and activated PKA (PKAc, red  
514 traces) in response to one trial of *Stim* ( $\mu\text{M}$ ). **B2**, Simulated time courses of pERK (orange traces,  $\mu\text{M}$ ),

515 PKAc (red traces) and *inducer* (violet traces, nM) in response to 12-trial protocol with regular intervals of  
516 2.5 min (full extinction, FE). **B3**, Simulated time courses of pERK (orange traces), PKAc (red traces) and  
517 *inducer* (violet traces) in response to 4-trial protocol with regular intervals of 2.5 min (partial extinction,  
518 PE). **B4**, Simulated time courses of pERK (orange traces), PKAc (red traces) and *inducer* (violet traces) in  
519 response to 4-trial protocol with computationally designed intervals (optimal partial extinction, OPE).  
520  
521 To test this prediction, we designed an experiment comparing the efficacy of different  
522 extinction protocols (**Fig. 5A**). We used conditioned suppression of reward-seeking  
523 behavior as an additional measure of fear memory because lever-press suppression is  
524 more sensitive than freezing during fear extinction paradigms ([Mast et al., 1982](#); [Sotres-](#)  
525 [Bayon et al., 2012](#)). In addition, lever presses help to maintain a constant level of  
526 activity so that freezing can be more reliably measured along the session ([Quirk et al.,](#)  
527 [2000](#)). Since lever presses for reward are trained in a specific context, and extinction  
528 memory is context-dependent ([Podlesnik et al., 2017](#); [Goode and Maren, 2014](#)), we  
529 used only one context in this experiment so that lever press suppression can be  
530 consistently assessed across sessions and the extinction memory can be retrieved after  
531 the extinction learning. Rats were initially trained to press a lever to receive sucrose  
532 pellets in a variable interval schedule of 60 s. After 7 days of training, rats reached the  
533 same levels of lever pressing (~10 presses/min) and locomotor activity (**Supplementary**  
534 **Fig. 1C**). On Day 8, they underwent a fear conditioning session which included five  
535 nonreinforced habituation tones (3 kHz, 75 dB, 30 s duration) followed by seven CS-US  
536 pairings (ITIs of 150 s, 37 min duration). In simulations, the OPE group showed peak  
537 levels of *inducer* comparable to the FE group and higher than the PE group when strong  
538 stimuli were used. We therefore increased the footshock intensity from 0.7 mA to 1.0

539 mA, which resulted in stronger fear acquisition and consequently higher freezing levels  
540 during the extinction session. This stimulus intensity also helped to avoid a “floor effect”  
541 in the following tests. On Day 9, rats were assigned to three experimental groups by  
542 matching their freezing and lever presses during the fear conditioning session: Full  
543 Extinction (FE), Partial Extinction (PE), and Optimal Partial Extinction (OPE) (One-way  
544 ANOVA.  $F_{(14, 231)} = 0.404$ ,  $P = 0.973$ ). On Day 10, rats were returned to the same  
545 chamber for a fear extinction session (39 min duration). The FE group received twelve  
546 CSs with ITIs of 150 s; the PE group received four CSs with ITIs of 150 s and remained  
547 in the chamber until the end of the session; and the OPE group received four CSs with  
548 ITIs of 8, 8, and 16 min (**Fig. 5B**). Our results revealed that at the end of the CS  
549 presentations, freezing levels reduced from ~50% to ~20% in the FE groups, whereas  
550 the PE and OPE groups maintained the same levels of freezing throughout the four CSs  
551 (**Fig. 5C, Day 8**). Similarly, the FE group showed a significant increase in lever presses  
552 (from 0.1 to 1.5 press/min) during the CS presentations from the beginning to the end of  
553 the session, whereas CS lever presses remained unaltered in the PE and OPE groups  
554 (**Supplementary Fig. 3A&B**; Paired Student’s t test; FE:  $t_{11} = 2.837$ ,  $p = 0.016$ ; PE:  $t_{10}$   
555  $= 1.000$ ,  $p = 0.341$ ; OPE:  $t_{12} = 1.237$ ,  $p = 0.239$ ). However, the OPE group showed a  
556 significant increase in lever presses during the 30-s periods that preceded the CS  
557 presentations (pre-CS) when comparing the first two pre-CS periods to the last pre-CS  
558 period of the extinction training session (**Fig. 5D&E**; Paired Student’s t test; FE:  $t_{11} =$   
559  $0.994$ ,  $p = 0.341$ ; PE:  $t_{10} = 1.111$ ,  $p = 0.293$ ; OPE:  $t_{12} = 3.773$ ,  $p = 0.003$ ), suggesting  
560 enhanced within-session extinction of contextual fear memory ([Morgan and LeDoux,](#)  
561 [1995](#)). On Days 10 and 35, rats were returned to the same chamber and received two

562 CSs with an ITI of 150 s to test the strength of fear extinction memory during extinction  
563 retrieval and spontaneous recovery tests, respectively. No significant difference in CS  
564 freezing or CS lever presses were observed among the three groups during these tests  
565 (**Fig. 5C, Day 10&35**; Two-way RM ANOVA. Day 10: Freezing,  $F_{(2, 33)} = 0.207$ ,  $P =$   
566  $0.814$ ; Lever Presses,  $F_{(2, 33)} = 0.069$ ,  $P = 0.933$ ; Day 35: Freezing,  $F_{(2, 33)} = 0.535$ ,  $P =$   
567  $0.591$ ; Lever Presses,  $F_{(2, 33)} = 1.085$ ,  $P = 0.350$ ). However, the OPE group showed  
568 increased pre-CS lever pressing rate either in the first pre-CS period (**Fig. 5D**; Two-way  
569 RM ANOVA followed by Tukey's planned comparison.  $F_{(2, 33)} = 2.897$ ,  $P = 0.069$ ; Tone  
570 1, a, FE vs. PE,  $p = 0.791$ ; b, FE vs. OPE,  $p = 0.025$ ; c, OPE vs. PE,  $p = 0.005$ ) or  
571 when averaging the two pre-CS periods during the spontaneous recovery test (**Fig. 5F**;  
572 Kruskal-Wallis's test followed by Dunn's post hoc test.  $H(2) = 6.414$ ,  $P = 0.041$ ; a: FE  
573 vs. OPE,  $p = 0.531$ ; b: FE vs. PE,  $p = 0.709$ ; c: OPE vs. PE,  $p = 0.035$ ), when compared  
574 to the FE and PE groups on day 35. These results suggest that, although the tone-  
575 associated memory was similar among the groups, our computationally designed OPE  
576 protocol was able to enhance the extinction of contextual fear memory, as indicated by  
577 enhanced within-session extinction of conditioned suppression and by reduced  
578 conditioned suppression approximately 3 weeks after the extinction training session.  
579

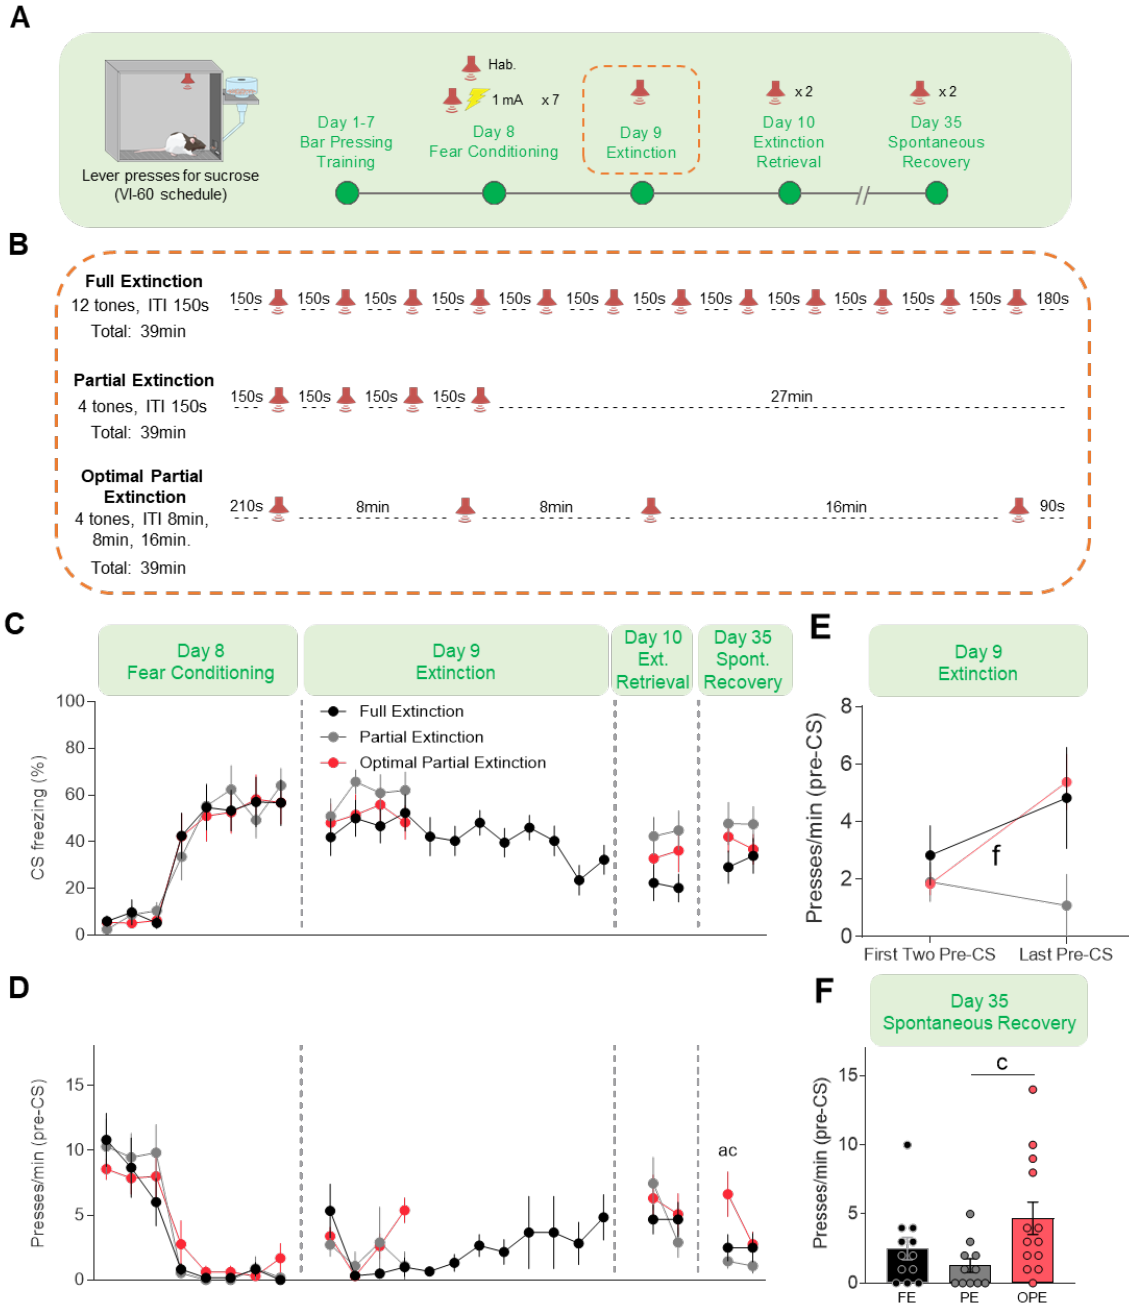

580

581 **Figure 5. Computationally designed protocol enhanced fear extinction in rats.** **A.** Schematic of the  
 582 enhanced fear extinction experimental procedures. Rats were trained to constantly press a lever to  
 583 retrieve sucrose pellets in a variable interval 60 (VI60) schedule, where the average interval between  
 584 each sucrose delivery is 60 s. **B.** Schematics of the fear extinction protocols for full extinction (FE, n =  
 585 12), partial extinction (PE, n = 11), and optimal partial extinction groups (OPE, n = 13), during which rats

586 received multiple trials of a conditioned stimulus (CS, 3 kHz tone, 30 s). **C**, Freezing levels during CS  
587 presentations of each group across the experiment. No significant difference between groups was found  
588 by Two-way RM ANOVA. **D**, Lever presses rates during the 30s of each CS presentation (pre-CS period)  
589 of each group across the experiment. Two-way repeated-measure ANOVA for each day followed by  
590 Tukey's pairwise post hoc test. Letters a and c indicate pairwise tests with  $p < 0.05$ : a, FE vs. OPE ; c,  
591 OPE vs. PE. **E**, OPE group shows significant increase of pre-CS lever presses comparing the last CS  
592 presentation to the average lever press rate of the first two CS presentations. Paired Student's t test.  
593 Letter f indicates test with  $p < 0.05$ : OPC, Last 4 CS vs. First 4 CS. **F**, OPE group shows higher lever  
594 presses during pre-CS period compared to PE group in spontaneous recovery test. One-way ANOVA  
595 followed by Tukey's post hoc test. Letter c indicates pairwise comparison with \*  $p < 0.05$ : OPE vs. PE.

596

## 597 **DISCUSSION**

598

599 Studies on nonassociative learning in invertebrates have provided significant insights  
600 about the molecular mechanisms of learning and memory due to their simplicity and  
601 tractability ([Byrne and Hawkins, 2015](#); [Kandel, 2001](#); [Carew and Sahley, 1986](#)). Long-  
602 term nonassociative learning in different regions of the nervous system or across  
603 different species shares many intracellular molecular cascades including cAMP-PKA  
604 and Raf-MEK-ERK signaling ([Bartsch et al., 1995](#); [Martin et al., 1997](#)). These two  
605 pathways are also required for associative learning in invertebrates and mammals  
606 ([Hawkins and Byrne, 2015](#); [Schafe and LeDoux, 2000](#); [Adams and Sweatt, 2002](#)). The  
607 conservation of these mechanisms makes these molecular cascades potential  
608 candidates for a universal intervention to enhance learning and memory. We have  
609 previously demonstrated that a computationally designed protocol that maximizes the  
610 interaction between PKA and ERK pathways enhances LTF and nonassociative

611 learning in *Aplysia* ([Zhang et al., 2011](#)). Here, we extended the feasibility of this  
612 computational approach to associative learning in mammals by adapting the simplified  
613 mathematical model used in *Aplysia* to simulate the dynamics of PKA and ERK in rat  
614 hippocampus based on empirical data available in the literature ([Wang et al., 2014](#);  
615 [Roberson and Sweatt, 1996](#); [Vázquez et al., 2000](#)). After simulating ~1000 different  
616 training protocols of auditory fear conditioning, we identified an optimal protocol with  
617 irregular ITIs which resulted in stronger fear acquisition and extinction-resistant memory  
618 formation in rats, when compared to either massed or spaced training protocols with  
619 equal ITIs. Using a separate fear extinction paradigm, we also showed that an optimal  
620 training protocol was sufficient to induce enhanced extinction of contextual fear memory  
621 in rats, when compared to standard or partial extinction protocols with equal ITIs. Our  
622 results demonstrate the power of a simplified model of intracellular signaling cascades  
623 in guiding associative learning across species, attesting the essential role of the  
624 interaction between PKA and ERK pathways in both nonassociative and associative  
625 learning. In addition, our findings highlight the potential clinical relevance of using  
626 computational modeling to enhance associative learning in patients with memory  
627 deficits, as well as to enhance extinction-based exposure therapies in patients with  
628 anxiety disorders.

629

630 Pioneering studies have demonstrated that training protocols using spaced ITIs result in  
631 stronger memory acquisition than those using standard massed ITIs, a well-established  
632 phenomenon described as the “trial-spacing effect” ([see review by Smolen et al., 2016](#)).  
633 Data demonstrating this effect in animals and humans illustrate the relationship between



634 the duration of the ITIs and the strength of memory formation as an inverted-U-shape  
635 curve ([Verkoeijen et al., 2005](#); [Barela, 1999](#)), consistent with our simulated results (Fig.  
636 1C). Previous findings have attributed this spacing effect to the different efficacy of  
637 massed vs. spaced protocols in inducing LTP/LTF through plasticity-related signaling.  
638 For instance, spaced training protocols in rodents lead to increased activation of ERK  
639 ([Ajay and Bhalla, 2007](#)), followed by CREB phosphorylation and the expression of  
640 downstream genes, which have not been reported following massed training protocols  
641 in the same species ([Genoux et al., 2002](#)). A computational model based on slice  
642 electrophysiology from rat hippocampal data has found that the peak of ERK activation  
643 aligns with the optimal ITI for LTP induction ([Ajay and Bhalla, 2004](#)). Although that study  
644 provided a possible mechanism for the trial-spacing effect and a potential approach to  
645 identify more effective protocols for associative learning, it relied on fixed ITIs that are  
646 not necessarily the optimal intervals to induce synaptic plasticity and LTM. In fact, our  
647 simulations showed that an optimal protocol with irregular ITIs was superior to most  
648 spaced protocols with the same number of trials and equal ITIs. In the fear conditioning  
649 experiment, the optimal protocol induced stronger and persistent fear memory in rats,  
650 when compared to a spaced protocol predicted to be the most efficient among protocols  
651 with equal ITIs. These results suggest that the trial-spacing effect in mammals can be at  
652 least partially explained by enhanced overlap between PKA and ERK pathways, which  
653 are critical for CREB activation ([Impey et al., 1998](#)). More importantly, our findings  
654 demonstrate that protocols that include irregular ITIs can be a better approach to  
655 enhance learning than previous protocols using equal ITIs.  
656

657 The enhanced performance of our optimal protocol (OPC) compared to a spaced  
658 protocol (SPC) during fear conditioning appears constrained by the intensity of stimuli.  
659 The model predicts higher performance for OPC when weak stimuli are used, but  
660 comparable performance when strong stimuli are used (**Fig. 3A**). Drawing a line to  
661 distinguish weak and strong footshock intensities is not straightforward because the  
662 relationship between fear memory and footshock intensity is neither monotonic nor  
663 linear ([Davis and Astrachan, 1978](#)). Nevertheless, we observed clear differences in the  
664 efficacy of the optimal fear conditioning protocol when using footshocks of different  
665 intensities. When we compared the optimal partial conditioning protocol to a massed  
666 partial conditioning protocol using a standard footshock intensity (0.7 mA, **Fig.2**)  
667 commonly used in previous studies ([Abel et al., 1997](#)), we found only small differences  
668 in the conditioned responses (CS freezing) between the two protocols. However, when  
669 we used a lower footshock intensity (0.5 mA, **Fig.3**) to compare the optimal partial  
670 conditioning protocol to a spaced partial conditioning protocol, we found a significant  
671 increase in CS freezing in the OPC group during fear acquisition, retrieval, and  
672 spontaneous recovery tests. Considering the robustness of the trial-spacing effect, it is  
673 possible that differences between the OPC and the massed PC groups at the higher  
674 footshock intensity were masked by a “ceiling effect”. These data suggest that our  
675 approach could be more beneficial for learning protocols relying on relatively weak  
676 stimuli. Additional studies need to be conducted to understand the mechanism by which  
677 the intensity of stimuli determines the enhanced performance of protocols with irregular  
678 ITIs compared to protocols with fixed ITIs.  
679

680 The association between the CS and US is primarily mediated by the lateral amygdala  
681 where LTP induces enhanced CS responses (see review by Maren, 2005; Johansen et  
682 al., 2011). Nevertheless, another important and distinguishable component of fear  
683 memory formation is the context in which the association has occurred. In the fear  
684 conditioning experiment, enhanced CS freezing by our computationally designed  
685 protocol was only observed in the same context where fear conditioning took place,  
686 suggesting that the memory facilitation effect induced by our optimal protocol is context  
687 dependent. Similarly, in the fear extinction experiment, enhancement by the optimal  
688 protocol was only observed during the pre-CS lever pressing, a more sensitive index of  
689 contextual fear memory during extinction and spontaneous recovery (Morgan and  
690 LeDoux, 1995; Padilla-Coreano et al., 2012; Woods and Bouton, 2008; Mast et al.,  
691 1982; Sotres-Bayon et al., 2012). These results are consistent with the fact that the  
692 model is based on empirical data from rat hippocampus currently available in the  
693 literature. The hippocampus plays major roles in context encoding during fear  
694 conditioning, fear extinction, and the time-dependent reappearance of fear following  
695 extinction training (*i.e.*, spontaneous recovery) (see reviews by Maren et al., 2013;  
696 Bouton et al., 2021). The observation that the temporal dynamics of ERK pathways  
697 differ across brain regions involved in fear memory, with peaks occurring at 20 min after  
698 stimulation in the hippocampus versus 60 min after fear conditioning in the lateral  
699 amygdala (Schafe et al., 2000; Di Benedetto et al., 2009; Wang et al., 2014) , suggests  
700 that the model may be able to predict optimal protocols targeting specific components of  
701 fear memory based on the dynamics of intracellular signaling cascades in distinct brain  
702 regions. Future studies will test this possibility by modeling the molecular cascades in

703 the lateral amygdala to preferentially target the acquisition and extinction of CS-  
704 associated memories.

705

706 It is worth noting that the model is an extremely simplified one. We did not consider  
707 many other important molecular cascades important for LTP and memory formation. For  
708 example, calcium/calmodulin-dependent protein kinase II (CaMKII) and protein kinase C  
709 (PKC) are also required for LTP induction ([Smolen et al., 2020](#); [Malenka et al., 1989](#);  
710 [Wang et al., 2016](#)). In addition, we built the model with empirical data of PKA and ERK  
711 dynamics from the literature, which are based on *ex vivo* analyses and have limited  
712 temporal resolution. However, despite these limitations, we demonstrated that the  
713 simplified model using essential biochemical cascades for learning and memory was  
714 sufficient to enhance associative learning in three different experiments in mammals. A  
715 more complex model that incorporates a wider range of intracellular and extracellular  
716 processes based on *in vivo* real-time data may strengthen the predictive ability of  
717 simulations. Further experiments should also investigate whether the memory  
718 enhancing effects of our optimal protocol vary across subjects of different sexes and  
719 ages, as well as its efficacy in animal models of cognitive impairment. Together, our  
720 results suggest the possibility of using similar model-driven, non-invasive behavioral  
721 approaches in preclinical and clinical studies aimed at enhancing learning or restoring  
722 memory deficits in humans.

723

724

725

726 **AUTHOR CONTRIBUTIONS**

727 X.O.Z, D.S.E., and C.E.C performed and analyzed the behavioral experiments. Y.Z.  
728 implemented the computational model and ran all simulations. P.S. helped design and  
729 implement the computational model. F.H.D-M and J.H.B supervised and contributed to  
730 all aspects of this study. All the authors participated in the design of the experiments.  
731 X.O.Z. and F.H.D-M interpreted the data and prepared the manuscript with comments  
732 from all the co-authors.

733

734 **ACKNOWLEDGEMENT**

735 We thank Nikita Watson and Sharon Gordon for their technical and administrative  
736 assistance. We also thank current members of the Byrne and Do Monte and Labs for  
737 their valuable comments on the manuscript. This work was supported by NIH grant  
738 R01-NS102490 to J.H.B, and NIH grant R00-MH105549, NIH grant R01-MH120136, a  
739 Brain & Behavior Research Foundation grant (NARSAD Young Investigator), and a  
740 Rising STARs Award from UT System to F.H.D-M.

741

742 **COMPETING INTERESTS**

743 The authors declare no competing interests.

744

745

746 **REFERENCES**

- 747 Abel T, Nguyen PV, Barad M, Deuel TA, Kandel ER, Bourtchouladze R (1997) Genetic  
748 demonstration of a role for pka in the late phase of ltp and in hippocampus-based  
749 long-term memory. *Cell* 88:615-626.
- 750 Adams JP, Sweatt JD (2002) Molecular psychology: Roles for the erk map kinase  
751 cascade in memory. *Annu Rev Pharmacol Toxicol* 42:135-163.
- 752 Ajay SM, Bhalla US (2004) A role for erkii in synaptic pattern selectivity on the time-  
753 scale of minutes. *Eur J Neurosci* 20:2671-2680.
- 754 Ajay SM, Bhalla US (2007) A propagating erkii switch forms zones of elevated dendritic  
755 activation correlated with plasticity. *HFSP J* 1:49-66.
- 756 Alberini CM (2009) Transcription factors in long-term memory and synaptic plasticity.  
757 *Physiol Rev* 89:121-145.
- 758 Anderson MJ, Jablonski SA, Klimas DB (2008) Spaced initial stimulus familiarization  
759 enhances novelty preference in long-evans rats. *Behav Processes* 78:481-486.
- 760 Barela PB (1999) Theoretical mechanisms underlying the trial-spacing effect in  
761 pavlovian fear conditioning. *Journal of Experimental Psychology: Animal*  
762 *Behavior Processes* 25:177.
- 763 Bartsch D, Ghirardi M, Skehel PA, Karl KA, Herder SP, Chen M, Bailey CH, Kandel ER  
764 (1995) *Aplysia creb2* represses long-term facilitation: Relief of repression  
765 converts transient facilitation into long-term functional and structural change. *Cell*  
766 83:979-992.

- 767 Berman DE, Dudai Y (2001) Memory extinction, learning anew, and learning the new:  
768 Dissociations in the molecular machinery of learning in cortex. *Science*  
769 291:2417-2419.
- 770 Bouton ME, Maren S, McNally GP (2021) Behavioral and neurobiological mechanisms  
771 of pavlovian and instrumental extinction learning. *Physiol Rev* 101:611-681.
- 772 Brown MT, Tan KR, O'Connor EC, Nikonenko I, Muller D, Luscher C (2012) Ventral  
773 tegmental area gaba projections pause accumbal cholinergic interneurons to  
774 enhance associative learning. *Nature* 492:452-456.
- 775 Byrne JH, Hawkins RD (2015) Nonassociative learning in invertebrates. *Cold Spring*  
776 *Harb Perspect Biol* 7.
- 777 Cain CK, Blouin AM, Barad M (2003) Temporally massed cs presentations generate  
778 more fear extinction than spaced presentations. *J Exp Psychol Anim Behav*  
779 *Process* 29:323-333.
- 780 Carew TJ, Sahley CL (1986) Invertebrate learning and memory: From behavior to  
781 molecules. *Annu Rev Neurosci* 9:435-487.
- 782 Cepeda NJ, Pashler H, Vul E, Wixted JT, Rohrer D (2006) Distributed practice in verbal  
783 recall tasks: A review and quantitative synthesis. *Psychol Bull* 132:354-380.
- 784 Dash PK, Hochner B, Kandel ER (1990) Injection of the camp-responsive element into  
785 the nucleus of aplysia sensory neurons blocks long-term facilitation. *Nature*  
786 345:718-721.
- 787 Davis M, Astrachan DI (1978) Conditioned fear and startle magnitude: Effects of  
788 different footshock or backshock intensities used in training. *J Exp Psychol Anim*  
789 *Behav Process* 4:95-103.

- 790 de Oliveira Alvares L, Do-Monte FH (2021) Understanding the dynamic and destiny of  
791 memories. *Neurosci Biobehav Rev* 125:592-607.
- 792 Detert JA, Kampa ND, Moyer JR, Jr. (2008) Differential effects of training intertrial  
793 interval on acquisition of trace and long-delay fear conditioning in rats. *Behav*  
794 *Neurosci* 122:1318-1327.
- 795 Di Benedetto B, Kallnik M, Weisenhorn DM, Falls WA, Wurst W, Holter SM (2009)  
796 Activation of erk/mapk in the lateral amygdala of the mouse is required for  
797 acquisition of a fear-potentiated startle response. *Neuropsychopharmacology*  
798 34:356-366.
- 799 Do-Monte FH, Manzano-Nieves G, Quinones-Laracuenta K, Ramos-Medina L, Quirk GJ  
800 (2015) Revisiting the role of infralimbic cortex in fear extinction with optogenetics.  
801 *J Neurosci* 35:3607-3615.
- 802 Ermentrout B (2002) *Simulating, analyzing, and animating dynamical systems : A guide*  
803 *to xppaut for researchers and students*. Philadelphia: Society for Industrial and  
804 *Applied Mathematics*.
- 805 Fernandez SM, Lewis MC, Pechenino AS, Harburger LL, Orr PT, Gresack JE, Schafe  
806 GE, Frick KM (2008) Estradiol-induced enhancement of object memory  
807 consolidation involves hippocampal extracellular signal-regulated kinase  
808 activation and membrane-bound estrogen receptors. *J Neurosci* 28:8660-8667.
- 809 Flood JF, Jarvik ME, Bennett EL, Orme AE, Rosenzweig MR (1977) Protein synthesis  
810 inhibition and memory for pole jump active avoidance and extinction. *Pharmacol*  
811 *Biochem Behav* 7:71-77.



- 812 Genoux D, Haditsch U, Knobloch M, Michalon A, Storm D, Mansuy IM (2002) Protein  
813 phosphatase 1 is a molecular constraint on learning and memory. *Nature*  
814 418:970-975.
- 815 Goldsmith BA, Abrams TW (1991) Reversal of synaptic depression by serotonin at  
816 aplysia sensory neuron synapses involves activation of adenylyl cyclase. *Proc*  
817 *Natl Acad Sci U S A* 88:9021-9025.
- 818 Goode TD, Maren S (2014) Animal models of fear relapse. *ILAR J* 55:246-258.
- 819 Hawkins RD, Byrne JH (2015) Associative learning in invertebrates. *Cold Spring Harb*  
820 *Perspect Biol* 7.
- 821 Holmes A, Quirk GJ (2010) Pharmacological facilitation of fear extinction and the search  
822 for adjunct treatments for anxiety disorders--the case of yohimbine. *Trends*  
823 *Pharmacol Sci* 31:2-7.
- 824 Impey S, Obrietan K, Wong ST, Poser S, Yano S, Wayman G, Deloulme JC, Chan G,  
825 Storm DR (1998) Cross talk between erk and pka is required for ca<sup>2+</sup> stimulation  
826 of creb-dependent transcription and erk nuclear translocation. *Neuron* 21:869-  
827 883.
- 828 Jiang L, Wang L, Yin Y, Huo M, Liu C, Zhou Q, Yu D, Xu L, Mao R (2019) Spaced  
829 training enhances contextual fear memory via activating hippocampal 5-ht<sub>2a</sub>  
830 receptors. *Front Mol Neurosci* 12:317.
- 831 Johansen JP, Cain CK, Ostroff LE, LeDoux JE (2011) Molecular mechanisms of fear  
832 learning and memory. *Cell* 147:509-524.
- 833 Kandel ER (2001) The molecular biology of memory storage: A dialogue between genes  
834 and synapses. *Science* 294:1030-1038.

- 835 Lauterborn JC, Palmer LC, Jia Y, Pham DT, Hou B, Wang W, Trieu BH, Cox CD,  
836 Kantorovich S, Gall CM, Lynch G (2016) Chronic ampakine treatments stimulate  
837 dendritic growth and promote learning in middle-aged rats. *J Neurosci* 36:1636-  
838 1646.
- 839 Lee K, Holley SM, Shobe JL, Chong NC, Cepeda C, Levine MS, Masmanidis SC (2017)  
840 Parvalbumin interneurons modulate striatal output and enhance performance  
841 during associative learning. *Neuron* 93:1451-1463 e1454.
- 842 Liu RY, Cleary LJ, Byrne JH (2011) The requirement for enhanced creb1 expression in  
843 consolidation of long-term synaptic facilitation and long-term excitability in  
844 sensory neurons of aplysia. *J Neurosci* 31:6871-6879.
- 845 Liu X, Ramirez S, Pang PT, Puryear CB, Govindarajan A, Deisseroth K, Tonegawa S  
846 (2012) Optogenetic stimulation of a hippocampal engram activates fear memory  
847 recall. *Nature* 484:381-385.
- 848 Lonsdorf TB et al. (2017) Don't fear 'fear conditioning': Methodological considerations  
849 for the design and analysis of studies on human fear acquisition, extinction, and  
850 return of fear. *Neurosci Biobehav Rev* 77:247-285.
- 851 Lynch G, Cox CD, Gall CM (2014) Pharmacological enhancement of memory or  
852 cognition in normal subjects. *Front Syst Neurosci* 8:90.
- 853 Lynch MA (2004) Long-term potentiation and memory. *Physiol Rev* 84:87-136.
- 854 Malenka RC, Kauer JA, Perkel DJ, Mauk MD, Kelly PT, Nicoll RA, Waxham MN (1989)  
855 An essential role for postsynaptic calmodulin and protein kinase activity in long-  
856 term potentiation. *Nature* 340:554-557.

- 857 Maren S (2005) Synaptic mechanisms of associative memory in the amygdala. *Neuron*  
858 47:783-786.
- 859 Maren S, Phan KL, Liberzon I (2013) The contextual brain: Implications for fear  
860 conditioning, extinction and psychopathology. *Nat Rev Neurosci* 14:417-428.
- 861 Martin KC, Michael D, Rose JC, Barad M, Casadio A, Zhu H, Kandel ER (1997) Map  
862 kinase translocates into the nucleus of the presynaptic cell and is required for  
863 long-term facilitation in aplysia. *Neuron* 18:899-912.
- 864 Martin SJ, Grimwood PD, Morris RG (2000) Synaptic plasticity and memory: An  
865 evaluation of the hypothesis. *Annu Rev Neurosci* 23:649-711.
- 866 Mast M, Blanchard RJ, Blanchard DC (1982) The relationship of freezing and response  
867 suppression in a cer situation. In, pp 151-167. US: Kenyon Coll Psychology Dept.
- 868 Mayes A, Montaldi D, Migo E (2007) Associative memory and the medial temporal  
869 lobes. *Trends Cogn Sci* 11:126-135.
- 870 McDougal RA, Morse TM, Hines ML, Shepherd GM (2015) Modelview for modeldb:  
871 Online presentation of model structure. *Neuroinformatics* 13:459-470.
- 872 McGaugh JL, Petrinovich LF (1965) Effects of drugs on learning and memory. *Int Rev*  
873 *Neurobiol* 8:139-196.
- 874 Milner B, Squire LR, Kandel ER (1998) Cognitive neuroscience and the study of  
875 memory. *Neuron* 20:445-468.
- 876 Morgan MA, LeDoux JE (1995) Differential contribution of dorsal and ventral medial  
877 prefrontal cortex to the acquisition and extinction of conditioned fear in rats.  
878 *Behav Neurosci* 109:681-688.

- 879 Muller U, Carew TJ (1998) Serotonin induces temporally and mechanistically distinct  
880 phases of persistent pka activity in aplysia sensory neurons. *Neuron* 21:1423-  
881 1434.
- 882 Nabavi S, Fox R, Proulx CD, Lin JY, Tsien RY, Malinow R (2014) Engineering a  
883 memory with ltd and ltp. *Nature* 511:348-352.
- 884 Nakazawa K, Quirk MC, Chitwood RA, Watanabe M, Yeckel MF, Sun LD, Kato A, Carr  
885 CA, Johnston D, Wilson MA, Tonegawa S (2002) Requirement for hippocampal  
886 ca3 nmda receptors in associative memory recall. *Science* 297:211-218.
- 887 Padilla-Coreano N, Do-Monte FH, Quirk GJ (2012) A time-dependent role of midline  
888 thalamic nuclei in the retrieval of fear memory. *Neuropharmacology* 62:457-463.
- 889 Philips GT, Tzvetkova EI, Carew TJ (2007) Transient mitogen-activated protein kinase  
890 activation is confined to a narrow temporal window required for the induction of  
891 two-trial long-term memory in aplysia. *J Neurosci* 27:13701-13705.
- 892 Phillips RG, LeDoux JE (1992) Differential contribution of amygdala and hippocampus  
893 to cued and contextual fear conditioning. *Behav Neurosci* 106:274-285.
- 894 Podlesnik CA, Kelley ME, Jimenez-Gomez C, Bouton ME (2017) Renewed behavior  
895 produced by context change and its implications for treatment maintenance: A  
896 review. *J Appl Behav Anal* 50:675-697.
- 897 Quirk GJ, Mueller D (2008) Neural mechanisms of extinction learning and retrieval.  
898 *Neuropsychopharmacology* 33:56-72.
- 899 Quirk GJ, Russo GK, Barron JL, Lebron K (2000) The role of ventromedial prefrontal  
900 cortex in the recovery of extinguished fear. *J Neurosci* 20:6225-6231.

- 901 Radulovic J, Tronson NC (2010) Molecular specificity of multiple hippocampal  
902 processes governing fear extinction. *Rev Neurosci* 21:1-17.
- 903 Raman M, McLaughlin K, Violato C, Rostom A, Allard JP, Coderre S (2010) Teaching in  
904 small portions dispersed over time enhances long-term knowledge retention.  
905 *Med Teach* 32:250-255.
- 906 Roberson ED, Sweatt JD (1996) Transient activation of cyclic amp-dependent protein  
907 kinase during hippocampal long-term potentiation. *The Journal of biological*  
908 *chemistry* 271:30436-30441.
- 909 Santini E, Muller RU, Quirk GJ (2001) Consolidation of extinction learning involves  
910 transfer from nmda-independent to nmda-dependent memory. *J Neurosci*  
911 21:9009-9017.
- 912 Santini E, Ge H, Ren K, Pena de Ortiz S, Quirk GJ (2004) Consolidation of fear  
913 extinction requires protein synthesis in the medial prefrontal cortex. *J Neurosci*  
914 24:5704-5710.
- 915 Schacher S, Castellucci VF, Kandel ER (1988) Camp evokes long-term facilitation in  
916 aplysia sensory neurons that requires new protein synthesis. *Science* 240:1667-  
917 1669.
- 918 Schafe GE, LeDoux JE (2000) Memory consolidation of auditory pavlovian fear  
919 conditioning requires protein synthesis and protein kinase a in the amygdala. *J*  
920 *Neurosci* 20:RC96.
- 921 Schafe GE, Atkins CM, Swank MW, Bauer EP, Sweatt JD, LeDoux JE (2000) Activation  
922 of erk/map kinase in the amygdala is required for memory consolidation of  
923 pavlovian fear conditioning. *J Neurosci* 20:8177-8187.

- 924 Scharf MT, Woo NH, Lattal KM, Young JZ, Nguyen PV, Abel T (2002) Protein synthesis  
925 is required for the enhancement of long-term potentiation and long-term memory  
926 by spaced training. *J Neurophysiol* 87:2770-2777.
- 927 Selden NR, Everitt BJ, Jarrard LE, Robbins TW (1991) Complementary roles for the  
928 amygdala and hippocampus in aversive conditioning to explicit and contextual  
929 cues. *Neuroscience* 42:335-350.
- 930 Sharif S, Guirguis A, Fergus S, Schifano F (2021) The use and impact of cognitive  
931 enhancers among university students: A systematic review. *Brain Sci* 11.
- 932 Sharma SK, Carew TJ (2004) The roles of mapk cascades in synaptic plasticity and  
933 memory in aplysia: Facilitatory effects and inhibitory constraints. *Learn Mem*  
934 11:373-378.
- 935 Sharma SK, Sherff CM, Shobe J, Bagnall MW, Sutton MA, Carew TJ (2003) Differential  
936 role of mitogen-activated protein kinase in three distinct phases of memory for  
937 sensitization in aplysia. *J Neurosci* 23:3899-3907.
- 938 Smolen P, Zhang Y, Byrne JH (2016) The right time to learn: Mechanisms and  
939 optimization of spaced learning. *Nat Rev Neurosci* 17:77-88.
- 940 Smolen P, Baxter DA, Byrne JH (2020) Comparing theories for the maintenance of late  
941 ltp and long-term memory: Computational analysis of the roles of kinase  
942 feedback pathways and synaptic reactivation. *Front Comput Neurosci*  
943 14:569349.
- 944 Sotres-Bayon F, Sierra-Mercado D, Pardilla-Delgado E, Quirk GJ (2012) Gating of fear  
945 in prelimbic cortex by hippocampal and amygdala inputs. *Neuron* 76:804-812.

- 946 Szapiro G, Vianna MR, McGaugh JL, Medina JH, Izquierdo I (2003) The role of nmda  
947 glutamate receptors, pka, mapk, and camkii in the hippocampus in extinction of  
948 conditioned fear. *Hippocampus* 13:53-58.
- 949 Tronson NC, Schrick C, Fischer A, Sananbenesi F, Pages G, Pouyssegur J, Radulovic  
950 J (2008) Regulatory mechanisms of fear extinction and depression-like behavior.  
951 *Neuropsychopharmacology* 33:1570-1583.
- 952 Vázquez SI, Vázquez A, Peña de Ortiz S (2000) Different hippocampal activity profiles  
953 for pka and pkc in spatial discrimination learning. *Behavioral Neuroscience*  
954 114:1109-1118.
- 955 Verkoijen PP, Rikers RM, Schmidt HG (2005) Limitations to the spacing effect:  
956 Demonstration of an inverted u-shaped relationship between interrepetition  
957 spacing and free recall. *Exp Psychol* 52:257-263.
- 958 Wang S, Sheng T, Ren S, Tian T, Lu W (2016) Distinct roles of pkiota/lambda and  
959 pkmzeta in the initiation and maintenance of hippocampal long-term potentiation  
960 and memory. *Cell Rep* 16:1954-1961.
- 961 Wang Y, Zhu G, Briz V, Hsu YT, Bi X, Baudry M (2014) A molecular brake controls the  
962 magnitude of long-term potentiation. *Nature communications* 5:3051.
- 963 Woods AM, Bouton ME (2008) Immediate extinction causes a less durable loss of  
964 performance than delayed extinction following either fear or appetitive  
965 conditioning. *Learn Mem* 15:909-920.
- 966 Zhang Y, Smolen PD, Cleary LJ, Byrne JH (2021) Quantitative description of the  
967 interactions among kinase cascades underlying long-term plasticity of aplysia  
968 sensory neurons. *Scientific reports* 11:14931.

969 Zhang Y, Liu RY, Heberton GA, Smolen P, Baxter DA, Cleary LJ, Byrne JH (2011)

970 Computational design of enhanced learning protocols. Nat Neurosci 15:294-297.

971

972

973

974

975

976

977

978

979

980

981

982

983

984

985

986

987

988

989

990

991



992 **SUPPLEMENTARY FIGURES**

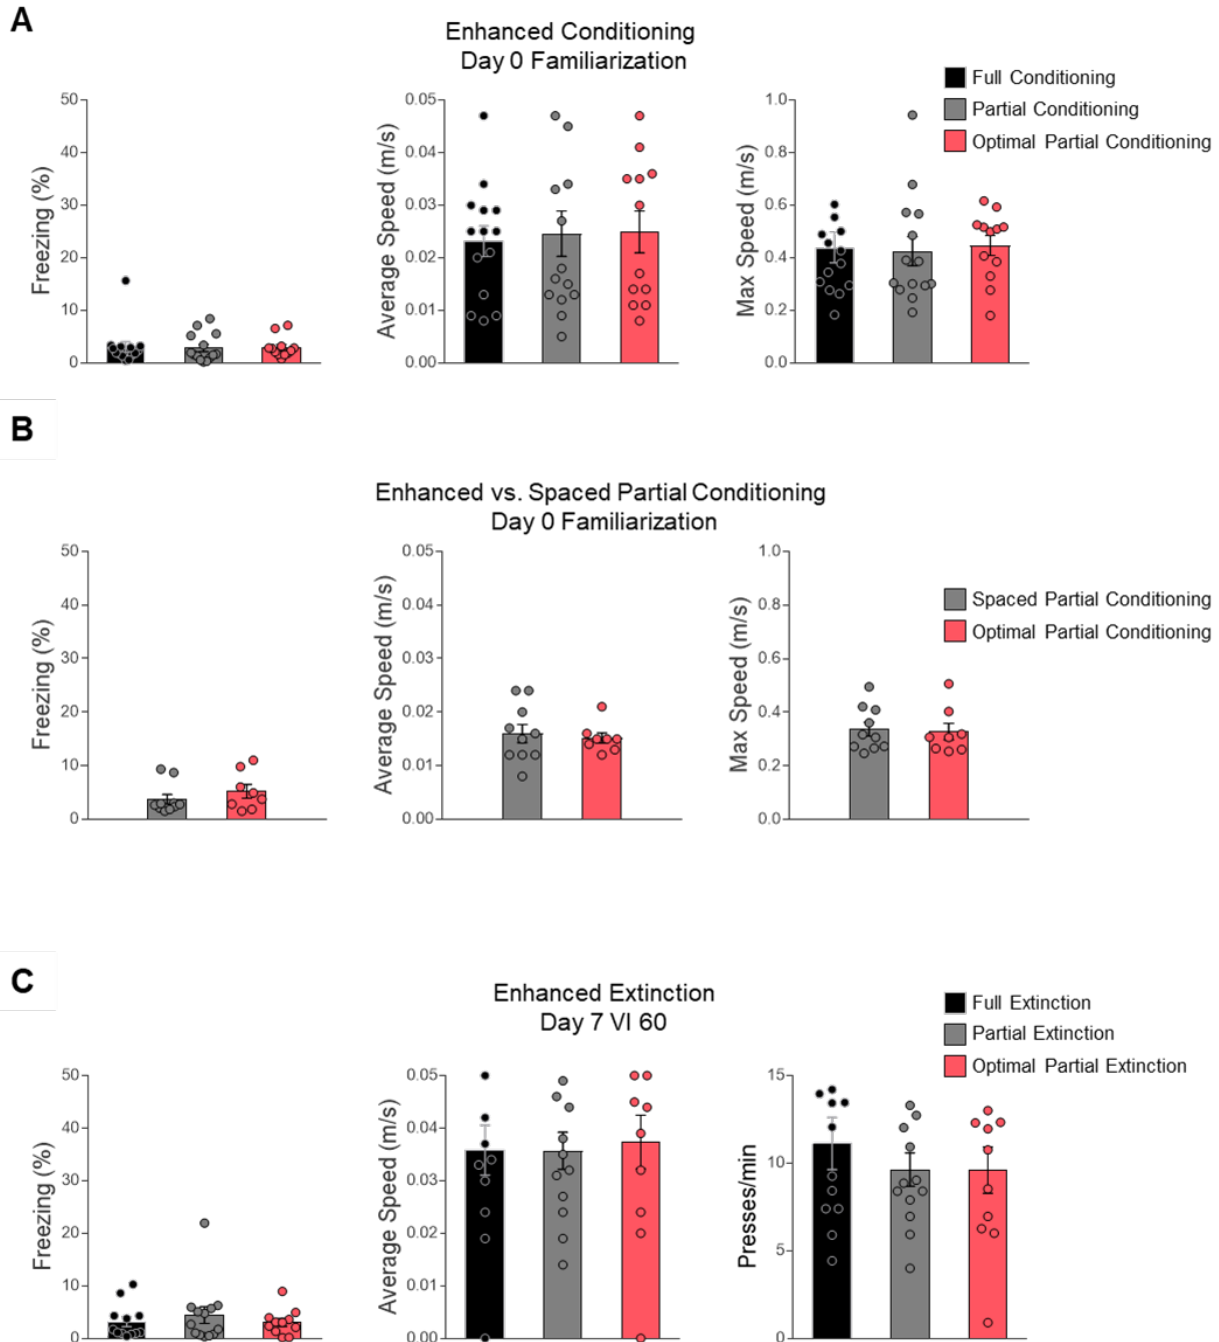

993

994 **Supplementary Figure 1. No difference of baseline activity between groups. A,** No differences in  
995 total freezing level (left), average speed (middle), and maximum speed (right) between the three groups  
996 were observed during familiarization of the enhanced conditioning experiment. **B,** No differences in total  
997 freezing level (left), average speed (middle), and maximum speed (right) were seen between the three

998 groups during familiarization of the enhanced vs. spaced conditioning experiment. **C**, No differences in  
999 total freezing level (left), average speed (middle), and rate of lever presses (right) were observed between  
1000 the three groups during the last day of lever presses training of the enhanced extinction experiment. One-  
1001 way ANOVA. Data shown as mean  $\pm$  SEM.

1002

1003

1004

1005

1006

1007

1008

1009

1010

1011

1012

1013

1014

1015

1016

1017

1018

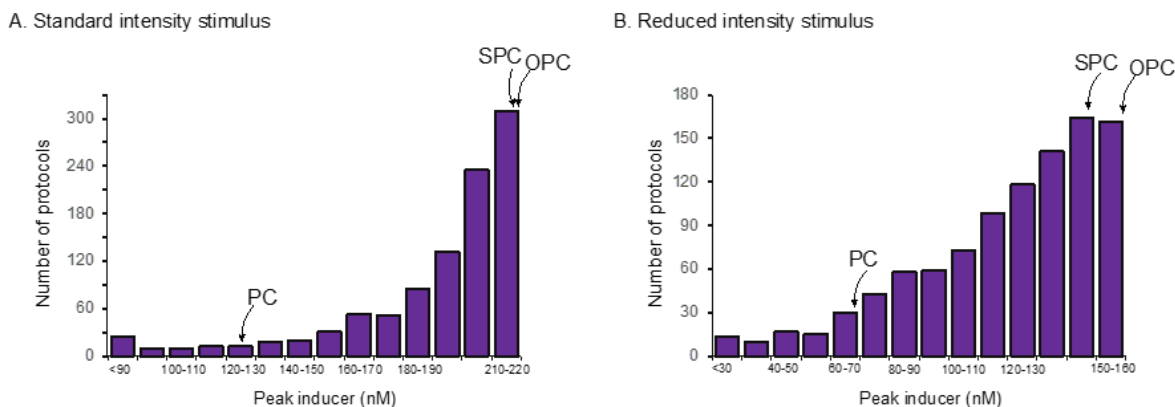

1019

1020 **Supplementary Figure 2. Histogram of peak levels of inducer from 1,000 protocols.** (A) Standard

1021 intensity stimulus ( $Stim = 300 \mu M$ ). The range of peak levels of inducer (0 nM - 220 nM) was subdivided

1022 into 14 bins, and the number of simulations that produced a peak concentration of inducer in each

1023 subdivision was plotted. The arrows indicate which bins contained the peak concentrations produced by

1024 the partial conditioning, spaced partial conditioning (SPC), and the optimal partial conditioning (OPC)

1025 protocols. (B) Reduced intensity stimulus ( $Stim = 200 \mu M$ ). The range of peak levels of inducer (0 nM -

1026 160 nM) was subdivided into 14 bins, and the number of simulations that produced a peak concentration

1027 of inducer in each subdivision was plotted.

1028

1029

1030

1031

1032

1033

1034

1035

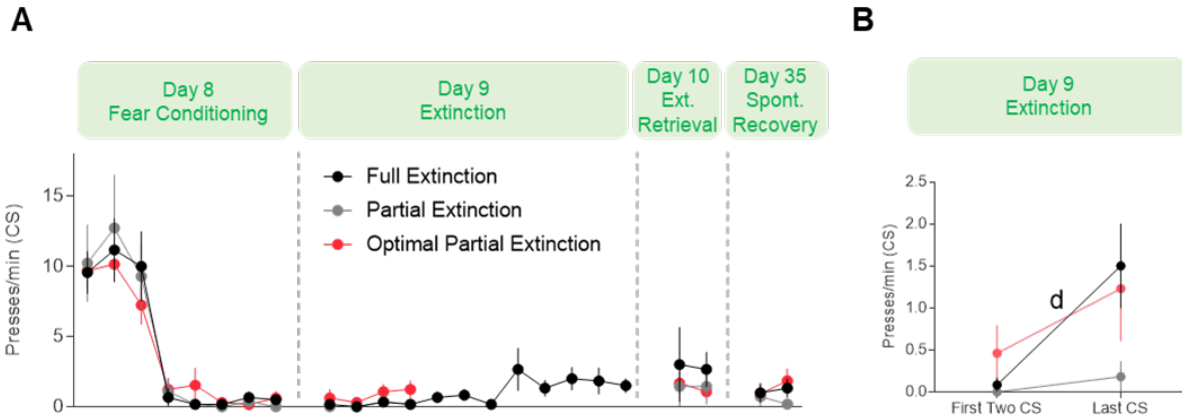

1036

1037 **Supplementary Figure 3. Lever press during CS presentations in enhanced extinction experiment.**

1038 **A**, Lever presses rates during CS presentations of each group across the experiment. Two-way repeated-

1039 measure ANOVA for each day found no difference among groups. **B**, FE group shows significant

1040 increase of CS lever presses comparing the last CS presentation to the average lever press rate of the

1041 first two CS presentations. Paired Student's t test. Letter d indicate test with  $p < 0.05$ : d, FE: Last 4 CS vs.

1042 First 4 CS.

1043
